## High-resolution genetic map and QTL analysis of growth-related traits of *Hevea brasiliensis* cultivated under suboptimal temperature and humidity conditions

1 André Ricardo Oliveira Conson<sup>1#</sup>, Cristiane Hayumi Taniguti<sup>2#</sup>, Rodrigo Rampazo Amadeu<sup>2#</sup>,  
2 Isabela Aparecida Araújo Andreotti<sup>1</sup>, Livia Moura de Souza<sup>1</sup>, Luciano Henrique Braz dos Santos<sup>1</sup>,  
3 João Ricardo Bachega Feijó Rosa<sup>2,3&</sup>, Camila Campos Mantello<sup>1,4§</sup>, Carla Cristina da Silva<sup>1</sup>, Erivaldo  
4 José Scaloppi Junior<sup>5</sup>, Rafael Vasconcelos Ribeiro<sup>6</sup>, Vincent Le Guen<sup>7</sup>, Antonio Augusto Franco  
5 Garcia<sup>2</sup>, Paulo de Souza Gonçalves<sup>5</sup>, Anete Pereira de Souza<sup>1,6\*</sup>

6  
7 <sup>1</sup>Molecular Biology and Genetic Engineering Center, University of Campinas, Campinas, Brazil

8 <sup>2</sup>Department of Genetics, Luiz de Queiroz College of Agriculture, University of São Paulo,  
9 Piracicaba, Brazil

10 <sup>3</sup>FTS Sementes S.A., Research and Development Center, Ponta Grossa, Brazil

11 <sup>4</sup>National Institute of Agricultural Botany (NIAB), Huntingdon Road, Cambridge CB3 0LE, UK

12 <sup>5</sup>Center of Rubber Tree and Agroforestry Systems, Agronomic Institute (IAC), Votuporanga, Brazil

13 <sup>6</sup>Department of Plant Biology, Institute of Biology, University of Campinas, Campinas, Brazil

14 <sup>7</sup>French Agricultural Research Centre for International Development (CIRAD), UMR AGAP,  
15 Montpellier, France

16  
17 <sup>&</sup> Present Address: FTS Sementes S.A., Research and Development Center, Ponta Grossa, Brazil

18 <sup>§</sup> Present Address: National Institute of Agricultural Botany (NIAB), Huntingdon Road, Cambridge  
19 CB3 0LE, UK

20

21 \*Correspondence:

22 Anete Pereira de Souza

23 anete@unicamp.br

24 #These authors contributed equally

### 25 **Keywords**

26 Rubber tree, linkage map, GBS, drought stress, SSR, suboptimal temperature and humidity

27

## 28 Abstract

29 Rubber tree (*Hevea brasiliensis*) cultivation is the main source of natural rubber worldwide and has  
30 been extended to areas with suboptimal climates and lengthy drought periods; this transition affects  
31 growth and latex production. High-density genetic maps with reliable markers support precise  
32 mapping of quantitative trait loci (QTL), which can help reveal the complex genome of the species,  
33 provide tools to enhance molecular breeding, and shorten the breeding cycle. In this study, QTL  
34 mapping of the stem diameter, tree height, and number of whorls was performed for a full-sibling  
35 population derived from a GT1 and RRIM701 cross. A total of 225 simple sequence repeats (SSRs)  
36 and 186 single-nucleotide polymorphism (SNP) markers were used to construct a base map with 18  
37 linkage groups and to anchor 671 SNPs from genotyping by sequencing (GBS) to produce a very  
38 dense linkage map with small intervals between loci. The final map was composed of 1,079 markers,  
39 spanned 3,779.7 cM with an average marker density of 3.5 cM, and showed collinearity between  
40 markers from previous studies. Significant variation in phenotypic characteristics was found over a  
41 59-month evaluation period with a total of 38 QTLs being identified through a composite interval  
42 mapping method. Linkage group 4 showed the greatest number of QTLs (7), with phenotypic  
43 explained values varying from 7.67% to 14.07%. Additionally, we estimated segregation patterns,  
44 dominance, and additive effects for each QTL. A total of 53 significant effects for stem diameter  
45 were observed, and these effects were mostly related to additivity in the GT1 clone. Associating  
46 accurate genome assemblies and genetic maps represents a promising strategy for identifying the  
47 genetic basis of phenotypic traits in rubber trees. Then, further research can benefit from the QTLs  
48 identified herein, providing a better understanding of the key determinant genes associated with  
49 growth of *Hevea brasiliensis* under limiting water conditions.

## 50 Introduction

51 *Hevea brasiliensis* (Willd. ex. Adr. de Juss.) Muell-Arg., also known as the rubber tree, is one of the  
52 most symbolic species from the Amazon basin owing to its worldwide use in natural latex  
53 production, the global demand for which suggests expansion of the industry (Warren-Thomas *et al.*,  
54 2015). It is a perennial and allogamous tree from the Euphorbiaceae family. Its breeding has started  
55 in 1876 (Priyadarshan and Clément-Demange, 2004). The main trait in domestication of this tree is  
56 yield and its improvement along the twentieth century is related with factors such as growth of the  
57 trunk during immature phase (Priyadarshan, 2017). Girth measurements has been the best and most  
58 practicable measure to determine the criterion of tappareability along the tree cycle (Dijkman, 1951).

59 The species contains 36 chromosomes ( $2n = 36$ ), and studies indicate that *H. brasiliensis* is an  
60 amphidiploid that has been stabilized its genome during the course of evolution (Saha and  
61 Priyadarshan, 2012). Because of its genome size and high repeat content (Lau *et al.*, 2016; Tang *et*  
62 *al.*, 2016), genetic analysis of the species represents considerable obstacles to breeding, and several  
63 methodologies must be used to better understand its organization (Fierst, 2015).

64 Rubber tree plantations are mainly located in Southeast Asia under optimal edaphoclimatic  
65 conditions due to the occurrence of the South America Leaf Blight (SALB) disease in Latin America.  
66 Because the species can be cultivated under suboptimal conditions, plantations in "escape areas",  
67 such as the southeastern region of Brazil, where epidemic SALB has not been found, might be an  
68 alternative for natural rubber production (Gonçalves *et al.*, 2011; Souza *et al.*, 2013; Jaimes *et al.*,  
69 2016). However, suboptimal conditions (temperature and humidity) affect plant development,  
70 consequently affecting rubber production (Silpi *et al.*, 2006; Rao and Kole, 2016).

71 Developing new rubber tree clones may extend up to 20-30 years and becomes expensive. Molecular  
72 markers can help identify allelic variants related to phenotypes adapted to these regions and can  
73 shorten the breeding cycle (Priyadarshan and Clément-Demange, 2004). Therefore, significant results  
74 obtained for other crops using effective and cost-efficient microsatellite markers associated with  
75 next-generation sequencing (NGS) technologies, such as the simultaneous discovery and genotyping  
76 of thousands of single-nucleotide polymorphisms (SNPs) through genotyping by sequencing (GBS)  
77 (Elshire *et al.*, 2011), can be very useful for *H. brasiliensis*.

78 Because no inbred lines are available for the rubber tree species, the mapping methods for these  
79 species must be adapted to full-sibling populations, once there are more alleles involved and linkage  
80 phases to be estimated compared with the population from inbred lines. The first and most  
81 widespread method for building genetic maps for outcrossing species is the pseudo-testcross, which  
82 allowed the first genetic mapping studies in such species, but it considers only markers segregating  
83 1:1 and results in separated maps for each parent (Grattapaglia and Sederoff, 1994). Later, several  
84 methods were proposed, including maximum likelihood estimators for all types of markers  
85 segregation (Maliepaard *et al.*, 1997) and the possibility to build integrated genetic maps using  
86 information from all available markers with multipoint estimation (Wu *et al.*, 2002b, 2002a). In the  
87 rubber tree, different methods have been used to obtain higher-resolution genetic maps (Pootakham  
88 *et al.*, 2015; Shearman *et al.*, 2015) than those obtained in previous studies (Lespinasse *et al.*, 2000;  
89 Souza *et al.*, 2013). Methods with higher-coverage genome reference sequences of the species are  
90 also important to detect markers associated with quantitative trait loci (QTL).

91 In addition to a reliable map, in QTL studies, it is also important to use a robust experimental design.  
92 Forestry experiments require large field areas due to the needed spacing for each tree. Therefore, the  
93 field area size limits the number of possible genotype replications in the design. Augmented blocks  
94 are a very efficient and widely used design proposed to address reduced numbers of replicates  
95 (Federer and Raghavarao, 1975). Joint analysis is possible using information from checks included in  
96 all incomplete blocks. To improve the statistical power in an augmented blocks design, a possible  
97 approach is to use replicated augmented blocks. After modeling and evaluating the experiment, it is  
98 possible to gather the genetic values for each genotype and to use them alongside the map in QTL  
99 mapping methods. The QTL method must also be adapted to outcrossing species. Gazaffi *et al.*,  
100 (2014) developed a composite interval mapping (CIM) model for outcrossing species considering  
101 integrated maps. The model uses maximum likelihood and mixture models to estimate three  
102 orthogonal contrasts, which are used to estimate additive and dominance effects and QTL segregation  
103 patterns and linkage phases within the molecular markers. The QTL screening includes cofactors to  
104 avoid influences from QTLs outside the mapping interval.

105 Here, we report an integrated high-density genetic map for *Hevea brasiliensis* obtained from a set of  
106 high-quality SNP and simple sequence repeat (SSR) markers. Moreover, the experiment was  
107 conducted in suboptimal environment, in order to explore QTLs under this condition. QTL mapping  
108 for complex traits related to plant growth (stem diameter, tree height, and the number of whorls) was  
109 performed over a 59-month evaluation period, allowing for more accurate QTL localization.

## 110 **Materials and methods**

### 111 **Mapping population and DNA extraction**

112 An F1 population containing 146 individuals was derived from open pollination between the  
113 genotypes GT1 and RRIM701. The GT1 clone, which has been widely used in *Hevea* breeding since  
114 the 1920s, is classified as a primary clone that is male sterile (Shearman *et al.*, 2015) and tolerant to

115 wind and cold. From the Asian breeding program, RRIM701 exhibits vigorous growth and an  
116 increased circumference after initial tapping (Romain and Thierry, 2011).

117 Effective pollination was confirmed using 10 microsatellite markers that were selected based on the  
118 polymorphism information content (PIC) and the polymorphisms between the parents. After  
119 removing two contaminants, the mapping population was planted at the Center of Rubber Tree and  
120 Agroforestry Systems/Agronomic Institute (IAC) in the northwest region of São Paulo state (20° 25'  
121 00" S and 49° 59' 00" W at a 450-meter altitude), Brazil, in 2012. The climate is the Köppen Aw  
122 type (Alvares *et al.*, 2013). Based on air temperature and rainfall, the water balance was calculated  
123 using the method developed by Thornthwaite and Mather (1955), adopting 100 mm as the maximum  
124 soil water holding capacity. An augmented block design was used (Federer and Raghavarao, 1975).  
125 To improve accuracy, the trial (one augmented block design) was repeated side-by-side four times  
126 with different randomizations. Each trial has four blocks and two plants (clones) per plot spaced at 4  
127 m by 4 m. Hereafter, trial is considered a repetition. Therefore, each block consisted of 37 genotypes  
128 of GT1 x RRIM701 crosses and four checks (GT1, PB235, RRIM701 and RRIM600). The  
129 experiment has a total of 656 (41 plots x 4 blocks x 4 repetition) plots and 1,312 trees.

130 Genomic DNA was extracted from lyophilized leaves using 2% cetyltrimethylammonium bromide  
131 (CTAB) as described by Doyle and Doyle (1987). DNA integrity was assessed by electrophoresis on  
132 an ethidium bromide-stained 1% agarose gel, and its concentration was estimated with a  
133 QuantiFluor-ST fluorometer (Promega, Madison, WI, USA).

#### 134 **Microsatellite analysis**

135 A total of 1,190 SSR markers, comprising 476 genomic markers (Souza *et al.*, 2009; Le Guen *et al.*,  
136 2011; Mantello *et al.*, 2012), 353 expressed sequence tag (EST)-SSR markers (Feng *et al.*, 2009;  
137 Silva *et al.*, 2014), and 361 additional unpublished EST-SSRs identified in cDNA libraries  
138 constructed from subtractive suppression hybridization libraries (Garcia *et al.*, 2011), were tested to  
139 verify polymorphisms between the parents. Subsequently, from 569 (48%) polymorphic markers,  
140 those with a more informative segregation pattern (Wu *et al.*, 2002b) and with a clear profile were  
141 selected, totaling 287 SSRs for the population genotyping.

142 The amplification of SSRs was performed as previously described by the authors. PCR products were  
143 visualized using three different techniques: (1) silver nitrate staining (Creste *et al.*, 2001); (2) LI-  
144 COR 4300 DNA analyzer (LI-COR Inc., Lincoln, NE, USA), and (3) ABI 3500XL DNA sequencer  
145 (Life Technologies, Carlsbad, CA, USA). Markers that were considered monomorphic or  
146 homozygous for both parents and markers without clear bands were excluded.

#### 147 **SNP analysis**

148 SNP markers were developed from full-length EST libraries (Silva *et al.*, 2014) and a bark  
149 transcriptome (Mantello *et al.*, 2014). A total of 391 SNPs was selected for genotyping using the  
150 Sequenom MassARRAY Assay Design program (Agena Bioscience®, San Diego, CA, USA) with  
151 the following parameters: (1) a high plex preset with a multiplex level = 24, (2) an amplicon length  
152 varying from 80 to 200 bp, and (3) number of iterations = 10. SNPs were selected for population  
153 genotyping using the Sequenom iPLEX MassARRAY® (Sequenom Inc., San Diego, California,  
154 USA) and were annotated within the mevalonate and 2-C-methyl-D-erythritol 4-phosphate (MEP)  
155 pathways, which are involved in latex biosynthesis and wood synthesis (Table S1). The first  
156 amplification reaction was performed using 1-3 ng of genomic DNA, and the subsequent steps were

157 performed following the manufacturer's instructions. MassArray Typer v4.0 software (Sequenom,  
158 Inc.) was used for allele visualization.

159 Ninety-six other polymorphic SNPs obtained from genomic (Souza *et al.*, 2016) and transcriptomic  
160 (Salgado *et al.*, 2014) data were also selected for genotyping using the BioMark™ Real-Time PCR  
161 system with the 96.96 Dynamic Array™ IFC (Fluidigm Corporation, San Francisco, CA, USA). For  
162 kompetitive allele-specific PCR (KASP) assays, 1.4 µL of KASP assay reagent, 5 µL of 2X assay  
163 loading reagent, 3.6 µL of ultrapure water, and 2.8 µL of KASP assay mix (12 µM allele-specific  
164 forward primer and 30 µM reverse primer) were used. Furthermore, 4.73 µL of KASP 2X reagent  
165 mix, 0.47 µL of 20X GT sample loading reagent, 0.3 µL of ultrapure water, and 240 ng of DNA were  
166 used for PCR. The thermal conditions for fragment amplification were 94°C for 15 minutes; 94°C for  
167 10 seconds; 57°C for 10 seconds; 72°C for 10 seconds; 10 cycles of 94°C for 20 seconds and 65°C to  
168 57°C for 1 minute (-0.8°C per cycle); and 26 cycles of 94°C for 20 seconds and 57°C for 1 minute.  
169 The genotyping data were analyzed using the BioMark™ SNP Genotyping Analysis v2.1.1 program.

170 To saturate the linkage map with more SNPs, we performed the GBS protocol as described by  
171 Elshire *et al.* (2011). GBS libraries were generated from 100 ng of genomic DNA, and the *EcoT22I*  
172 enzyme was used to reduce the genomic complexity. Library quality checks were performed using  
173 the Agilent DNA 1000 Kit with the Agilent 2100 Bioanalyzer (Agilent Technologies, Santa Clara,  
174 USA). Library sequencing was performed on an Illumina GAIIx platform (Illumina Inc., San Diego,  
175 CA, USA). Quality assessment of the generated sequence data was performed with the NGS QC  
176 Toolkit v2.3.3 (Patel and Jain, 2012).

177 Sequencing data analysis was performed using TASSEL-GBS v3.0 (Bradbury *et al.*, 2007). Retained  
178 tags with a minimum count of six reads were aligned to the *H. brasiliensis* reference genome  
179 sequence, GenBank: LVXX000000000.1 (Tang *et al.*, 2016), using Bowtie2 version 2.1 (Langmead  
180 and Salzberg, 2012). The obtained variant call format (VCF) files were filtered using VCFtools  
181 (Danecek *et al.*, 2011), and only biallelic SNPs, with a maximum of 25% missing data, were retained.  
182 Additionally, SNPs were filtered by removing redundant markers, segregation-distorted markers, and  
183 markers homozygous for both parents using the R package OneMap v2.1.1 (Margarido *et al.*, 2007).

## 184 Genetic mapping

185 An integrated linkage map was developed in two stages in which all markers were tested for  
186 segregation distortion ( $p$ -value < 0.05) with Bonferroni's multiple test correction. All of the  
187 following logarithm of the odds (LOD) thresholds were also obtained based on Bonferroni's multiple  
188 test correction according to the number of two point tests. First, a base map with SSR and SNP  
189 markers (except GBS-based SNPs) was built, and the markers were grouped using an LOD value of  
190 5.37 and a maximum recombination frequency of 0.4. The markers were ordered through a hidden  
191 Markov chain multipoint approach (Lander and Green, 1987) considering outcrossing species (Wu *et al.*,  
192 2002a). The most informative markers (1:1:1:1) were ordered using exhaustive search, and the  
193 remaining markers were positioned using the TRY algorithm (Lander and Green, 1987). The RIPPLE  
194 algorithm (Lander and Green, 1987) was used to improve final orders. The marker order of this first  
195 map was fixed before insertion of the GBS-based markers. Later, the GBS markers were grouped  
196 into the base map considering an LOD of 7.22 and a maximum recombination fraction of 0.4. The  
197 best position for each marker was identified using the TRY and RIPPLE algorithms. All of the  
198 analyses were performed using OneMap software v2.1.1 (Margarido *et al.*, 2007; Mollinari *et al.*,  
199 2009). The Kosambi mapping function was used (Kosambi, 1943) to estimate map distances.

## 200 Phenotypic analysis

201 Tree height, number of whorls, and stem diameter at 50 cm above ground level were measured to  
202 evaluate the growth of individual trees, with mean values calculated based on two plants per plot.  
203 Because the early attainment of tappable girth is one of the main selection traits for *H. brasiliensis*  
204 breeding (Rao and Kole, 2016), stem diameters were measured at seven different ages between July  
205 2013 and June 2017 (12, 17, 22, 28, 35, 47, and 59 months). The tree heights and numbers of whorls  
206 were measured at 17 and 22 months.

207 The statistical linear mixed model used for the analysis was as follows:

$$208 \quad y = X_A a + X_R r + X_{AR} ar + Z_B b + Z_G g + \varepsilon$$

209 where  $y$  is the vector with the mean phenotypic trait per plot; and  $X_A$ ,  $X_R$ , and  $X_{AR}$  are the incidence  
210 matrices for the fixed effects for age ( $a$ ), replicate ( $r$ ), and interaction age  $\times$  replicate ( $ar$ ).  $Z_B$  and  $Z_G$   
211 are the incidence matrices for the random effects for block ( $b$ ) and genotype ( $g$ ), with  $b \sim$   
212  $MVN(0, I_B \otimes I_R \otimes G_{AB})$  and  $g \sim MVN(0, I_G \otimes G_{AG})$ , where  $I_n$  is an identity matrix with order  $n$ ;  
213  $\otimes$  is the Kronecker product;  $MVN$  stands for Multivariate Normal Distribution; and  $G_{AB}$  and  $G_{AG}$  are  
214 the variance-covariance matrices for the effects of replicates within blocks within age and within  
215 genotype within age, respectively.  $\varepsilon$  is the residual, where  $\varepsilon \sim MVN(0, R_C \otimes R_R \otimes R_A)$ , where  $R_C$ ,  
216  $R_R$ , and  $R_A$  are the variance-covariance matrices for the column, row, and age for the residual effects,  
217 respectively. Different variance-covariance structures for  $V_{AB}$ ,  $V_{AG}$ ,  $R_C$ ,  $R_R$ , and  $R_A$  were adjusted and  
218 compared based on the Akaike information criterion (AIC) (Akaike, 1974) and the Bayesian  
219 information criterion (BIC) (Schwarz, 1978) values (Table S2). The variance components were  
220 estimated by maximizing the maximum likelihood distribution (REML). Analyses were performed  
221 using the packages ASReml-R v3 (Gilmour *et al.*, 2009) and ASRemlPlus (Brien, 2016). The  
222 heritability ( $H^2$ ) for each age was estimated as presented by Cullis *et al.* (2006) and Piepho and  
223 Möhring (2007), where  $H^2 = 1 - \frac{\bar{v}_{BLUP}}{2\sigma_{AG}^2}$  and  $\bar{v}_{BLUP}$  indicates the mean variance between the two best  
224 linear unbiased predictions (BLUPs). After the phenotypic analysis, we used the differences between  
225 estimated BLUPs of subsequent ages for QTL mapping. As an example, for a genotype with a BLUP  
226 of 10 cm of diameter at 17 months and with a BLUP of 13 cm of diameter at 22 months, the  
227 difference of BLUPs (i.e., 3 cm) was used in the QTL mapping.

## 228 QTL mapping

229 QTL mapping for stem diameter, tree height, and number of whorls traits was performed by applying  
230 a CIM model to full-sib families (Gazaffi *et al.*, 2014). This method uses a multipoint approach that  
231 considers outcrossing segregation patterns and, through contrasts, estimates three genetic effects, one  
232 for each parent (hereafter called the additive effect) and one for their interaction (hereafter called the  
233 dominance effect). For the CIM model, QTL genotype probabilities were obtained for each 1-cM  
234 interval considering a window size of 15 cM. Cofactors were identified for each linkage group using  
235 stepwise selection based on the AIC (Akaike, 1974) to select the models. Furthermore, a maximum  
236 number of parameters,  $2\sqrt{n}$ , where  $n$  is the number of individuals, was used to avoid super-  
237 parametrization (Gazaffi *et al.*, 2014). Subsequently, only effects with a 5% significance level were  
238 retained in the cofactor model. QTLs were defined according to a threshold based on 5% significance  
239 across distributed LOD scores obtained by selecting the second LOD profile peak from 1,000  
240 permutations (Chen and Storey, 2006). Additionally, for each CIM model, the additive genetic  
241 effects for each parent, the dominance effects, and the linkage phases, segregation patterns, and

242 proportions of phenotypic variations explained by the QTLs ( $R^2$ ) were estimated. Analyses were  
243 performed using the R package fullsibQTL (Gazaffi *et al.*, 2014).

## 244 **Results**

### 245 **Filtering and polymorphism analysis**

246 For the linkages analysis 239 SNP markers from genomic, transcriptomic, and cDNA datasets were  
247 retained. The marker segregation for the SSRs and SNPs are shown in Table 1. All genotyped  
248 markers, including 33 markers (6.3%) identified with distortion from the expected Mendelian  
249 segregation ratio, were retained in the linkage analysis.

250 The GBS library generated a total of 68,777,856 raw reads (90.60% Q20 bases), with an average of  
251 474,330 reads per individual. After alignment to the *H. brasiliensis* reference genome, 81,832 SNPs  
252 were identified. In total, 53,836 markers with more than 25% missing data and/or a non-biallelic  
253 status, 1,587 redundant markers, 17,865 markers with two homozygous parents, and 5,546 markers  
254 with segregation distortion were eliminated. Thus, a total of 2,998 (3.66% of the initial set of  
255 markers) high-quality GBS-based SNPs were retained, most of which were classified in a 1:1 fashion  
256 (2,371 SNPs).

### 257 **Genetic mapping**

258 A total of 411 markers were mapped in the base map constructed from a set of 526 markers (287  
259 SSRs and 239 SNPs). The markers were distributed over 18 linkage groups (LG) in 2,482.3 cM  
260 (Figure 1), and the length of each group ranged from 78.3 cM (LG4) to 191.9 cM (LG14). Linkage  
261 group 10 showed the highest average density and the highest number of markers mapped (53),  
262 whereas linkage group 15 showed the lowest density (Table 2).

263 The final genetic map, constructed using advances from the previous base map and the numerous  
264 high-quality SNPs produced with the GBS technique, was based on 408 previously mapped markers  
265 and 671 SNPs identified from GBS (Bioproject PRJEB25899). One SSR and two SNP markers were  
266 removed from the base map to build the final map because there were inconsistencies in their  
267 primers. Therefore, 1,079 mapped markers were distributed over 18 LGs and covered a total of  
268 3,779.7 cM (Figure 2). The length of each group ranged from 109.4 cM and 44 markers (LG7) to 272  
269 cM and 74 markers (LG5), with average marker densities of 2.5 and 3.7 cM, respectively.

270 The SNPs identified from GBS were uniformly distributed across the genetic map (markers in black  
271 in Figure 2), resulting in improvements in group assessment and shortening of gaps compared with  
272 the base map (Figure 1). Moreover, a reduction in the number of gaps greater than 15 cM to only  
273 eight was observed, which was previously verified on 41 occasions.

### 274 **Phenotypic analysis and QTL mapping**

275 Field-grown rubber trees were subjected to low water availability during the experimental period  
276 (Figure S1), which gave us an interesting opportunity to evaluate the performance of all genotypes  
277 under limiting conditions. In fact, stem diameter, tree height and number of whorls varied  
278 significantly throughout the experimental period and the highest rates of stem growth were found  
279 between November 2014 and June 2015, when water was less limiting (Figures S1 and S2).

280 BLUP values were used to perform QTL mapping, indicating the variance-covariance structures and  
281 criteria information for the selected models shown in Table 3. Table 4 shows phenotypic and

282 genotypic values for the F1 population and each parent. Table 4 also shows the  $H^2$  for each age, and  
283 the variance components for  $V_{AG}$  and  $R_A$ .

284 For QTL mapping analyses of the stem diameter, tree height, and number of whorls, several QTLs  
285 were identified by CIM for full-sibling progenies at different ages of growth. Using this method, 24  
286 QTLs were identified for stem diameter, seven were identified for height, and seven were identified  
287 for the number of whorls (Table 5 and Figure 3). The QTLs were located in 12 of the 18 linkage  
288 groups, and most were in LG9 (5) for height and diameter and in LG4 (7) and LG15 (5) for all traits.  
289 A significant number of QTLs for diameter were also observed in LG17 (4). All QTLs were named  
290 with the prefix of the trait evaluated, the date (in months), and the linkage group mapped, for  
291 example, Diameter12-LG2.

292 From the total QTLs identified in this analysis, five were identified at 12 months, 11 at 17 months  
293 (four for height, three for the number of whorls, and four for diameter), 10 at 22 months (three for  
294 height, four for the number of whorls, and three for diameter), four at 28 months, three at 35 months,  
295 two at 47 months, and three at 59 months. The percentages of phenotypic variation ( $R^2$ ) explained by  
296 the QTLs ranged from 1.08% (Whorls17-LG14) to 14.07% (Height17-LG4), and the QTLs were  
297 segregated according to the ratios 1:1:1:1, 1:2:1, 3:1, and 1:1. The obtained threshold values for LOD  
298 scores using 1,000 permutations ranged from 3.94 (Diameter at 59 months) to 4.25 (Diameter at 22  
299 months) and were used to declare the presence of QTLs.

300 QTLs associated with height occurred in seven LGs. QTL Height17-LG4 had the highest LOD score  
301 (6.72), whereas QTL Height17-LG15 had the lowest LOD score (4.23). Additionally, QTL Height17-  
302 LG4 had the highest proportion of phenotypic variation for this trait (14.07%), and QTL Height17-  
303 LG9 had the lowest (6.24%). For QTL Height17-LG9, Height17-LG15, and Height22-LG11,  
304 dominance and additive effects were observed for RRIM701, whereas dominance and additive effects  
305 for GT1 were observed only for QTL Height22-LG6.

306 For the number of whorls, QTLs were detected in five LGs. The LOD scores for these QTL ranged  
307 from 4.13 (Whorls17-LG14) to 8.59 (Whorls22-LG4), whereas the highest proportion of phenotypic  
308 variation was observed for QTL Whorls17-LG15 (10.22%). Based on the signals of the additive and  
309 dominance estimate effects, different segregation patterns for each of the QTLs were inferred. Up to  
310 three main effects (one additive effect for each parent and one dominance effect) were observed for  
311 QTL Whorls17-LG4, Whorls22-LG8, and Whorls22-LG12.

312 Although 24 different QTLs were mapped for the diameter trait over seven developmental stages, the  
313 most representative linkage groups mapped were LG4 (12, 17, 35 and 47 months), LG9 (12, 17, 22,  
314 and 59 months), and LG17 (12, 17, 35, and 47 months). The Diameter QTLs accounted for 3.01%  
315 (Diameter35-LG17) to 13.03% (Diameter17-LG4) of the total phenotypic variation, whereas the  
316 LOD scores ranged from 4.15 (Diameter59-LG15) to 10.06 (Diameter35-LG4). The most  
317 representative segregation patterns observed for the QTLs were of the 1:2:1 type (12 QTLs), but all  
318 types were inferred at least once. Among the 53 effects estimated for diameter, only a few were  
319 observed for RRIM701 (21 additive effects for GT1, 13 additive effects for RRIM701, and 19  
320 dominance effects). All of the QTLs identified at 12, 22, and 35 months showed significant  
321 dominance effects.

## 322 Discussion

323 The mapping population was based on a cross between two important commercial clones, GT1 and  
324 RRIM701. Figure S2 shows that the chosen parents are contrasting for the analyzed traits; their mean



325 are outside the interquartile range. GT1 performed better in our evaluations, this can be a reflex of the  
326 environmental conditions of our trial (suboptimal region with extent drought period). GT1 is known  
327 by its climate resistance response (Cheng et al., 2015; Moreno et al., 2005; Priyadarshan et al., 2009)  
328 and suitable to be used in a study which aimed QTL mapping for drought tolerance. The construction  
329 of the mapping population was possible because GT1 is male sterile (Shearman *et al.*, 2014), and  
330 there was a large experimental area with both parental clones. Using open-pollinated progenies from  
331 a mother tree of interest facilitated the development of progeny and accelerated linkage map  
332 construction and QTL detection, as in sweet cherries (Guajardo *et al.*, 2015). The limited number of  
333 progenies obtained reflects the nature of the low fruit-set success of the rubber tree, varying from no  
334 success at all to a maximum of 5-10% in controlled pollination assays (Priyadarshan and Clément-  
335 Demange, 2004).

336 Based on these findings, the approach employed an expressive number of marker loci, with the  
337 ultimate goal of having a well-saturated map. During genetic map construction, the utilization of  
338 reliable and informative markers, such as microsatellites, might circumvent the need for phase  
339 estimation. As many markers have already been mapped in the rubber tree (Souza *et al.*, 2013), use of  
340 the same markers from existing datasets is preferred to avoid confounding factors, as suggested by  
341 Hodel *et al.* (2016).

342 Although we observed that the proportion of polymorphic SSR markers between parents of the  
343 mapping population (48%) was consistent with that previously reported for *Hevea brasiliensis*  
344 (Lespinasse *et al.*, 2000; Souza *et al.*, 2013), we observed a higher proportion of EST-SSR  
345 polymorphisms than Nirapathpongporn *et al.* (2016). The number of observed polymorphic SSR  
346 markers allowed the preferable selection of highly informative markers to construct the base linkage  
347 map, e.g., the 1:1:1:1 fashion (Table 1).

348 Using highly informative markers together with numerous markers provided by NGS technology is  
349 advantageous. The strategy utilized herein consisted of first building a reliable base map with  
350 informative markers and then increasing its resolution with biallelic markers. To increase the  
351 reliability of markers obtained from NGS technologies, numerous GBS data filtering efforts have  
352 recently been described in several species (Peng *et al.*, 2013; Ward *et al.*, 2013; Guajardo *et al.*,  
353 2015; Covarrubias-Pazarán *et al.*, 2016), with the objective of avoiding false polymorphism  
354 identification because of a low read depth. This objective is particularly important for large genomes  
355 containing many short repeat sequences (Fierst, 2015). To improve the genomic SNP discovery  
356 approach, a solid reference genome sequence is imperative. Thus far, a series of research studies  
357 focusing on *Hevea brasiliensis* reference genomes has been published (Rahman *et al.*, 2013; Lau *et*  
358 *al.*, 2016; Tang *et al.*, 2016; Pootakham *et al.*, 2017), which can be beneficial in linkage mapping  
359 studies.

360 Compared with other species from Malpighiales, *Hevea* species contain the largest genomes but  
361 might also have the largest repeat content (Tang *et al.*, 2016). Seventy percent of the *H. brasiliensis*  
362 genome is composed of repeat elements, which, together with the lack of information at the  
363 chromosomal level, leads to difficulties with assembly (Rahman *et al.*, 2013) and challenges in the  
364 identification and development of SNP assays (Souza *et al.*, 2016). Moreover, differences in the  
365 estimated rubber tree genome size have been observed by microdensitometry, flow cytometry  
366 (Bennett and Smith, 1997), and 17-mer sequence estimation (Tang *et al.*, 2016) approaches.

367 We verified the effects of inserting non-Mendelian markers in the map before including them in the  
368 base map. Segregation distortion is a common phenomenon in genetic analysis, although it might

369 affect the estimated recombination fractions between markers (Xu, 2008). Among the GBS-based  
370 SNPs, 5,546 exhibited segregation distortion and were excluded due to the increased complexity of  
371 such a large number of markers. The analysis of such markers with segregation distortion could help  
372 identify whether one or both parents carry lethal or sublethal alleles and could aid in understanding  
373 the genetic architecture of floral development and fertility genes (Covarrubias-Pazaran *et al.*, 2016).

374 Previous genetic map studies of *H. brasiliensis* have revealed the influences of reference genome  
375 sequences. Shortly after the first draft sequence became available for the species (Rahman *et al.*,  
376 2013), Shearman *et al.* (2015) and Pootakham *et al.* (2015) performed SNP genotyping with high-  
377 throughput platforms. Pootakham *et al.* (2015) used a read depth  $\geq 6$  and fewer than 50% missing  
378 data to obtain 7,345 and 6,678 SNPs in two different populations. Additionally, after using more  
379 restrictive parameters (read depth  $\geq 30$  and 10% missing data) and filtering uninformative markers,  
380 2,995 and 3,124 SNPs were identified. These quantities are similar to those obtained in the present  
381 work. It is important to mention that the map construction relies on several genetic features (e.g.,  
382 Mendelian segregation) present on segregating populations. Therefore, after filtering, markers were  
383 tested for these features, avoiding the presence of non-reliable markers.

384 The identification of SNPs in species that underwent polyploidization events, as demonstrated in  
385 *Hevea brasiliensis* (Pootakham *et al.*, 2017), leads to the utilization of appropriate strategies for the  
386 selection of useful markers for linkage mapping (Clevenger *et al.*, 2015). A reduction of the final  
387 number of obtained SNPs (2,998 SNPs) reflects the restrictive parameters used for marker selection.  
388 The genotyping errors and large amounts of missing data observed in NGS data (Nielsen *et al.*,  
389 2011), particularly in GBS, could have effects on the ordering of loci and the estimation of distances  
390 between two loci (Shields *et al.*, 1991; Hackett and Broadfoot, 2003). Thus, these factors can  
391 critically affect the localization of regions that control quantitative traits (Doerge *et al.*, 1997).

392 The 2,998 SNPs obtained after filtering enabled higher marker densities than those of microsatellite-  
393 based maps (i.e., Lespinasse *et al.*, 2000; Le Guen *et al.*, 2008; Souza *et al.*, 2013). GBS  
394 methodology provides 1:2:1 and 1:1 markers (biallelic), with 1:1 as the most frequent (Table 1). The  
395 later markers are less informative because they carry information for only one parent meiosis event  
396 (Wu *et al.*, 2002b). In our study, we have the advantages of both marker types, a larger number of  
397 SNPs, and greater information assessment of SSR.

398 Linkage group organization of the final map was based on previous studies of *H. brasiliensis*  
399 (Lespinasse *et al.*, 2000; Souza *et al.*, 2013) and allowed the order of the markers to be compared  
400 with those in common with other mapping populations. With 228.7 cM and 20 markers mapped,  
401 linkage group 10 was the largest linkage group obtained by Souza *et al.* (2013), and this group shared  
402 a total of 10 markers with those in our work, with the minor positioning difference between markers  
403 HB135 and HB174. A total of nine markers were positioned in the same order by Souza *et al.* (2013)  
404 in linkage group 14 at a greater density. In addition, previous genetic maps have demonstrated 18  
405 LGs (Lespinasse *et al.*, 2000; Le Guen *et al.*, 2008; Pootakham *et al.*, 2015; Shearman *et al.*, 2015;  
406 Nirapathpongporn *et al.*, 2016), corresponding to the haploid number for the species ( $2n = 36$ ). The  
407 LGs obtained with 225 SSRs and 186 SNPs support the observations by Souza *et al.* (2013),  
408 demonstrating the necessity of mapping using different types of markers to account for additional  
409 LGs from incomplete coverage of the *H. brasiliensis* genome.

410 Although our base genetic map presented a higher mean marker density than that presented by  
411 Triwitayakorn *et al.* (2011) and Souza *et al.* (2013) when mapping 97 and 284 SSRs, respectively,  
412 marker intervals greater than 15 cM were observed on 41 occasions. As noted by Souza *et al.* (2013),

413 such results can be explained by regions with low recombination frequency, with higher degrees of  
414 homozygosity, and with a low number of polymorphic markers, reinforcing the indispensable usage  
415 of other methodologies that provide a greater number of markers to increase resolution.

416 The GBS technique has promoted the discovery of thousands of polymorphic markers that are useful  
417 for the construction of high-density linkage maps. Because increasing marker densities in low-  
418 resolution regions can be beneficial for traditional mapping approaches and QTL mapping, GBS has  
419 become a valid and interesting alternative. Although GBS technology has been available for *H.*  
420 *brasiliensis* for several years (Pootakham *et al.*, 2015; Shearman *et al.*, 2015), no studies on the  
421 beneficial effects of SSR markers, such as those performed on *Brassica* species (Yang *et al.*, 2016),  
422 have been performed for *Hevea*.

423 Our base genetic map including 225 SSRs markers was essential for avoiding problems during  
424 linkage group formation, ordering, and marker distance estimation. Inserting numerous GBS-based  
425 SNP markers reduced the average marker interval in all LGs, with a mean of 3.5 cM (Table 2).  
426 Regions with a low marker density in the base map (i.e., LG13 and LG15), with gaps up to 24.2 cM  
427 and 32.5 cM, were saturated. As in other linkage mapping studies using large-scale genotyping  
428 methodologies for *H. brasiliensis* (Pootakham *et al.*, 2015; Shearman *et al.*, 2015), substantial  
429 intervals ( $\geq 10$  cM) were observed, supporting the results obtained in different plant species  
430 (Guajardo *et al.*, 2015; Marubodee *et al.*, 2015; Boutet *et al.*, 2016; McCallum *et al.*, 2016). The  
431 remaining gaps are common and even expected using GBS, mainly due to centromeric regions,  
432 which are not reached using this approach.

433 Our final map has a total of 1,079 markers and spans 3,779.7 cM, which reflects the molecular source  
434 and chosen mapping methodology. Comparatively, Souza *et al.*, (2013) and Lespinasse *et al.*, (2000)  
435 presented smaller maps, with 2688.8 cM and 2144 cM of total size, respectively. This size difference  
436 can be explained by several reasons: i) the smaller number of markers (284 and 717, respectively),  
437 cover a smaller genome region; ii) those studies used only non-NGS markers, which are likely to  
438 have fewer genotyping errors; and iii) as well as in Pootakham *et al.*, (2015), the map from  
439 Lespinasse *et al.*, (2000) uses strategies to reduce map size, removing improbable genotypes, such as  
440 those originating from double recombinations (Hackett and Broadfoot, 2003). However, the later  
441 strategy can also remove real recombinant events (false positives), particularly if the marker order is  
442 inaccurate (Wu *et al.*, 2008). In our case, the consequence is to not account for those recombinant  
443 events in the further QTL mapping studies.

444 The constructed linkage map allowed the anchoring of 601 scaffolds (Table S3), accounting for  
445 approximately 8.1% of the current number of scaffolds available in the reference genome spanning  
446 653.3 Mb (47.5% of the genome sequence). Therefore, although SNPs were not mapped in most  
447 parts of the scaffolds, these data constitute a representative part of the genome. Sequence contiguity  
448 of the rubber tree genome can be achieved as scaffold reviews are developed. Thus, the linkage map  
449 presented herein and the anchored scaffolds represent a foundation for future efforts.

450 The identification of genes underlying growth-related traits is critical for perennial crops grown in  
451 marginal areas. Tree growth is determined by different factors as cell division and expansion in  
452 apical and cambial meristems, developmental and seasonal transitions, photosynthesis, uptake and  
453 transport of nutrients and water, and responses to biotic and abiotic stresses (Grattapaglia *et al.*,  
454 2009). As consequence, tree growth is a complex phenomenon and possibly governed by many  
455 QTLs, which makes the usage of molecular markers for molecular breeding also a complex task. Our  
456 phenotypic evaluation showed values of heritability between 0.45 and 0.57 (Table 4), values higher

457 than observed in Souza, et al., (2013). Additionally, our phenotypic model has a variance-covariance  
458 structure for the time (Ar1 or US, Table 3). The Ar1 structure allows higher correlations between  
459 close periods and, as the periods became distant, this correlation decreases. Since there were just two  
460 evaluations for the traits with the US structure, it has similar to the Ar1 pattern. These values show  
461 that a considerable part of the trait variance is related to genetic factors and provide the foundation to  
462 our QTL studies. The many growth-related QTLs identified in several LGs under suboptimal  
463 temperature and humidity conditions herein and in the study conducted by Souza *et al.* (2013)  
464 confirmed the numerous biological processes involved in *H. brasiliensis* tree growth (Figure 3).  
465 Elucidation of all the involved factors is imperative considering that rubber breeding has stagnated  
466 (Tang *et al.*, 2016) and has migrated to marginal areas (Priyadarshan, 2017). The results obtained  
467 herein provide new information regarding QTL control of growth-related traits during almost five  
468 consecutive years in different seasons. Most importantly, characterizing QTLs in dry seasons can be  
469 advantageous because this strategy appears to be the most important factor for the identification of  
470 escape areas (Jaimes *et al.*, 2016) and limits growth and latex production.

471 The climatological water balance revealed that sampling was performed in consecutive water deficit  
472 periods, although exceptions included very brief intervals with very high precipitation levels in  
473 March 2014 and January 2016 (Figure S1). In a suboptimal climate area with a lengthy dry season,  
474 Chanroj *et al.* (2017) found a single SNP associated with girth accounting for 14% of the phenotypic  
475 variance in *H. brasiliensis*. Although this was not observed herein, the QTLs identified in our work  
476 can also be used as an initial source for marker-assisted selection because seven QTLs showed major  
477 effects (phenotypic variance greater than 10%) (Table 5). These QTLs are supported by previous  
478 growth-related QTLs observed for the species under seasonal water stress (Souza *et al.*, 2013).  
479 Because loss of water vapor through leaf transpiration occurs while capturing atmospheric CO<sub>2</sub> for  
480 photosynthesis, the QTLs identified in our study provide powerful information regarding the  
481 mechanisms of water use efficiency in *H. brasiliensis*. Indeed, the search for favorable alleles for  
482 growth must continue as in the study conducted by Coupel-Ledru *et al.* (2016), which identified four  
483 QTLs related to reduced nighttime transpiration in *Vitis vinifera*.

484 Several periods of low water availability were noticed during the experimental period, from July  
485 2012 to June 2017 (Figure S1). Such water deficit clearly affected stem growth, with the maximum  
486 growth rates being found when water was less limiting, i.e. between November 2014 and June 2015  
487 (Figure S2). In fact, the trees restored their stem growth rate between the 28th and 35th months of  
488 experiment through a complex process involving the rearrangement of many metabolic pathways in a  
489 process defined as drought recovery (Luo, 2010). Such recovery capacity may play a more important  
490 role in drought resistance (Chen et al., 2016) and screening of genotypes with fast or efficient  
491 recovery of growth would be an interesting strategy from the breeding point of view.

492 For the stem diameter trait, we highlight the QTL Diameter35-LG17. Its genomic region is related  
493 with cadmium-induced protein AS8-like (Table S4). Because of the water deficiency, growth of roots  
494 is favored over that of leaves (Hsiao and Xu, 2000). On the other hand, root system can absorb more  
495 cadmium resulting in oxidative stress (Loix *et al.*, 2017). Interesting QTLs were also observed in  
496 linkage group 5 in May (22 months) and November 2014 (28 months). Water deficit intensity in  
497 2014 was highest and such QTLs were consistent with those previously mapped by Souza *et al.*  
498 (2013). Flanking QTL Height22-LG5, it is possible to observe a new marker developed (SNP  
499 Hb\_seq\_234) that has been annotated in the hydroxymethylglutaryl-CoA reductase (NADPH)  
500 pathway and mapped on scaffold0419.

501 Because all of the QTLs identified for stem diameter at 12, 22, and 35 months showed significant  
502 dominance effects (Table 5), their contribution appeared to play a role in phenotypic variation.  
503 Different effects, positions, and segregation patterns of QTLs detected over time must be considered  
504 with caution, particularly for *Hevea brasiliensis*, which has a long breeding cycle. Variations could  
505 be possible because different genes are involved in genotype-environment interactions or QTL  
506 regulation according to the developmental stage (Conner *et al.*, 1998). In linkage group 4, QTLs with  
507 large effects were very important because the same genomic region appeared to control tree height,  
508 the number of whorls, and stem diameter.

509 Additionally, important QTLs in linkage group 6 have already been mapped by Souza *et al.* (2013)  
510 for both girth and tree height in a different mapping population cultivated under suboptimal growth  
511 conditions. Annotation of the sequences (Table S4) showed similarity with the *peptidyl-prolyl cis-*  
512 *trans isomerase FKBP15-1-like* gene, another good candidate gene worthy of further investigation.  
513 The activity of this isomerase has been shown to accelerate the process of protein folding both *in*  
514 *vitro* and *in vivo* (Marivet *et al.*, 1994). Regulated by light in chloroplasts (Luan *et al.*, 1994), it may  
515 also be regulated by stress and play an important role throughout the plant life cycle (Marivet *et al.*,  
516 1994). Therefore, further research of genes associated with abiotic stress and latex production in the  
517 rubber tree is required, as evidenced by the large number of plantations in areas with suboptimal  
518 climates.

519 The recent opportunity to associate high-density genetic maps with reference genomes in rubber tree  
520 is a key challenge to increase rubber production in marginal areas. The genetic map constructed  
521 herein, which included several approaches to handle thousands of markers, can be useful to improve  
522 rubber tree genome assembly, which still is fragmented into many scaffolds. The map allowed the  
523 identification of genomic regions related to growth under water stress revealing its genetic  
524 architecture. Such information can be further used as targets for genetic engineering. On the other  
525 hand, our results can be useful for breeders identify each parent alleles that contribute to increase  
526 values of the phenotypic traits. Breeders can also explore these resources to apply marker-assisted  
527 selection. Additionally, rubber tree breeding programs can benefit from the resources generated by  
528 adding these QTL effects as covariates in genomic selection models.

## 529 **Conflict of interest**

530 The authors declare no conflicts of interest.

## 531 **Author contributions**

532 Conceived and designed the experiments: AG, AS, PG, VG. Conducted the experiments and  
533 collected data: AC, CS, CM, IA, LHS, LMS. Analyzed the data: AC, AG, CT, JR, RA, RR. Collected  
534 phenotypic data: EJ. Wrote the manuscript: AC, AS, CT, RA. All of the authors read and approved  
535 the manuscript.

## 536 **Funding**

537 The authors would like to acknowledge the Fundação de Amparo a Pesquisa do Estado de São Paulo  
538 (FAPESP) for the financial support provided (2007/50392-1, 2012/50491-8) and PhD and Post-  
539 doctoral scholarships to LMS (2012/05473-1), CM (2011/50188-0, 2014/18755-0), CS (2009/52975-  
540 0, 2015/24346-9) and LHS (2014/11807-5, 2017/07908-9). The authors are also thankful to the  
541 Conselho Nacional de Desenvolvimento Científico e Tecnológico (CNPq) for PhD fellowships  
542 awarded to AC, CT, and RR; the MS fellowship awarded to RA; research fellowships awarded to  
543 AG, AS, and PG; and a post-doctoral fellowship awarded to CS. We also acknowledge the

544 Coordenação do Aperfeiçoamento de Pessoal de Nível Superior (CAPES Computational Biology  
545 Program) for grants and post-doctoral fellowships awarded to AC, LMS, and JR and a Master  
546 fellowship awarded to IA. The authors are thankful to CAPES – Agropolis Program for the  
547 fellowship to AC to attend a four-month training internship at CIRAD, UMR AGAP, on the Rubber  
548 Tree Breeding Program, Montpellier, France. The authors would like to acknowledge the Agropolis –  
549 UNICAMP Fellowship Program for the fellowship awarded to Aline da Costa Lima Moraes, the  
550 Molecular Biology Technician at Molecular and Genetic Analysis Laboratory, CBMEG /  
551 UNICAMP, to attend a one-month training internship at CIRAD, UMR AGAP on the Rubber Tree  
552 Breeding Program, Montpellier, France.

## 553 Acknowledgements

554 We acknowledge Aline da Costa Lima Moraes for support with the experiments and Kaio Olímpio  
555 das Graças Dias and Jhonathan Pedroso Rigal dos Santos for helping with the phenotypic analyses.

## 556 References

- 557 Akaike, H. (1974). A new look at the statistical model identification. *IEEE Trans. Autom. Control* 19,  
558 716–723. doi:10.1109/TAC.1974.1100705.
- 559 Alvares, C. A., Stape, J. L., Sentelhas, P. C., De Moraes Gonçalves, J. L., and Sparovek, G. (2013).  
560 Köppen’s climate classification map for Brazil. *Meteorol. Zeitschrift* 22, 711–728.  
561 doi:10.1127/0941-2948/2013/0507.
- 562 Bennett, M. D., and Smith, J. B. (1997). Nuclear DNA Amounts in Angiosperms. *Philos. Trans. R.*  
563 *Soc. B Biol. Sci.* 274, 227–274. doi:10.1098/rstb.1976.0044.
- 564 Boutet, G., Alves Carvalho, S., Falque, M., Peterlongo, P., Lhuillier, E., Bouchez, O., et al. (2016).  
565 SNP discovery and genetic mapping using genotyping by sequencing of whole genome genomic  
566 DNA from a pea RIL population. *BMC Genomics* 17, 121. doi:10.1186/s12864-016-2447-2.
- 567 Bradbury, P. J., Zhang, Z., Kroon, D. E., Casstevens, T. M., Ramdoss, Y., and Buckler, E. S. (2007).  
568 TASSEL: Software for association mapping of complex traits in diverse samples.  
569 *Bioinformatics* 23, 2633–2635. doi:10.1093/bioinformatics/btm308.
- 570 Brien, C. (2016). ASRemlPlus: Augments the Use of ‘ASReml’ in Fitting Mixed Models. R package  
571 version 2.0-9.
- 572 Butler, D. G., Cullis, B. R., Gilmour, A. R., and Gogel, B. J. (2009). ASReml-R reference manual,  
573 release 3. Technical report.
- 574 Chanroj, V., Rattanawong, R., Phumichai, T., Tangphatsornruang, S., and Ukoskit, K. (2017).  
575 Genome-wide association mapping of latex yield and girth in Amazonian accessions of *Hevea*  
576 *brasiliensis* grown in a suboptimal climate zone. *Genomics*, 0–1.  
577 doi:10.1016/j.ygeno.2017.07.005.
- 578 Chen, D., Wang, S., Cao, B., Cao, D., Leng, G., Li, H., et al. (2016). Genotypic Variation in Growth  
579 and Physiological Response to Drought Stress and Re-Watering Reveals the Critical Role of  
580 Recovery in Drought Adaptation in Maize Seedlings. *Front. Plant Sci.* 6, 1–15.  
581 doi:10.3389/fpls.2015.01241.

- 582 Chen, L., and Storey, J. D. (2006). Relaxed significance criteria for linkage analysis. *Genetics* 173,  
583 2371–2381. doi:10.1534/genetics.105.052506.
- 584 Cheng, H., Cai, H., Fu, H., An, Z., Fang, J., Hu, Y., et al. (2015). Functional characterization of  
585 Hevea brasiliensis CRT/DRE binding factor 1 gene revealed regulation potential in the CBF  
586 pathway of tropical perennial tree. *PLoS One* 10, 8–14. doi:10.1371/journal.pone.0137634.
- 587 Clevenger, J., Chavarro, C., Pearl, S. a., Ozias-Akins, P., and Jackson, S. a. (2015). Single nucleotide  
588 polymorphism identification in polyploids: A review, example, and recommendations. *Mol.*  
589 *Plant* 8, 831–846. doi:10.1016/j.molp.2015.02.002.
- 590 Conner, P. J., Brown, S. K., and Weeden, N. F. (1998). Molecular-marker analysis of quantitative  
591 traits for growth and development in juvenile apple trees. *Theor. Appl. Genet.* 96, 1027–1035.  
592 doi:10.1007/s001220050835.
- 593 Coupel-Ledru, A., Lebon, E., Christophe, A., Gallo, A., Gago, P., Pantin, F., et al. (2016). Reduced  
594 nighttime transpiration is a relevant breeding target for high water-use efficiency in grapevine.  
595 *Proc. Natl. Acad. Sci.* 113, 201600826. doi:10.1073/pnas.1600826113.
- 596 Covarrubias-Pazaran, G., Diaz-Garcia, L., Schlautman, B., Deutsch, J., Salazar, W., Hernandez-  
597 Ochoa, M., et al. (2016). Exploiting genotyping by sequencing to characterize the genomic  
598 structure of the American cranberry through high-density linkage mapping. *BMC Genomics* 17,  
599 451. doi:10.1186/s12864-016-2802-3.
- 600 Creste, S., Neto, A. T., and Figueira, A. (2001). Detection of Single Sequence Repeat Polymorphisms  
601 in Denaturing Polyacrylamide Sequencing Gels by Silver Staining. *Plant Mol. Biol. Report.* 19,  
602 299–306.
- 603 Cullis, B. R., Smith, A. B., and Coombes, N. E. (2006). On the design of early generation variety  
604 trials with correlated data. *J. Agric. Biol. Environ. Stat.* 11, 381–393.  
605 doi:10.1198/108571106X154443.
- 606 Danecek, P., Auton, A., Abecasis, G., Albers, C. A., Banks, E., DePristo, M. A., et al. (2011). The  
607 variant call format and VCFtools. *Bioinformatics* 27, 2156–2158.  
608 doi:10.1093/bioinformatics/btr330.
- 609 Dijkman, M. J. (1951). *Hevea Thirty Years of Research in the Far East*. 1st ed. Waltham,  
610 Massachusetts, USA: The Chronica Botanica Co.
- 611 Doerge, R. W., Zeng, Z., and Weir, B. S. (1997). Statistical issues in the search for genes affecting  
612 quantitative traits in experimental populations. *Stat. Sci.* 12, 195–219.  
613 doi:10.1214/ss/1030037909.
- 614 Doyle, J. J., and Doyle, J. L. (1987). A rapid DNA isolation procedure for small quantities of fresh  
615 leaf tissue. *Phytochem. Bull.* 19, 11–15. doi:10.2307/4119796.
- 616 Elshire, R. J., Glaubitz, J. C., Sun, Q., Poland, J. a, Kawamoto, K., Buckler, E. S., et al. (2011). A  
617 robust, simple genotyping-by-sequencing (GBS) approach for high diversity species. *PLoS One*  
618 6, e19379. doi:10.1371/journal.pone.0019379.

- 619 Federer, A. W. T., and Raghavarao, D. (1975). On Augmented Designs. *Biometrics* 31, 29–35.
- 620 Feng, S. P., Li, W. G., Huang, H. S., Wang, J. Y., and Wu, Y. T. (2009). Development,  
621 characterization and cross-species/genera transferability of EST-SSR markers for rubber tree  
622 (*Hevea brasiliensis*). *Mol. Breed.* 23, 85–97. doi:10.1007/s11032-008-9216-0.
- 623 Fierst, J. L. (2015). Using linkage maps to correct and scaffold de novo genome assemblies : methods  
624 , challenges , and computational tools. *Front. Genet.* 6, 1–8. doi:10.3389/fgene.2015.00220.
- 625 Garcia, D., Carels, N., Koop, D. M., de Sousa, L. A., Andrade Junior, S. J. de, Pujade-Renaud, V., et  
626 al. (2011). EST profiling of resistant and susceptible *Hevea* infected by *Microcyclus ulei*.  
627 *Physiol. Mol. Plant Pathol.* 76, 126–136. doi:10.1016/j.pmpp.2011.07.006.
- 628 Gazaffi, R., Margarido, G. R. A., Pastina, M. M., Mollinari, M., and Garcia, A. A. F. (2014). A  
629 model for quantitative trait loci mapping, linkage phase, and segregation pattern estimation for a  
630 full-sib progeny. *Tree Genet. Genomes* 10, 791–801. doi:10.1007/s11295-013-0664-2.
- 631 Gilmour, A. R., Gogel, B. J., Cullis, B. R., and Thompson, R. (2009). ASReml user guide release 3.0.  
632 *VSN Int. Ltd*, 275. doi:10.1017/CBO9781107415324.004.
- 633 Gonçalves, P. D. S., Scaloppi Júnior, E. J., Martins, M. A., Moreno, R. M. B., Branco, R. B. F., and  
634 Gonçalves, E. C. P. (2011). Assessment of growth and yield performance of rubber tree clones  
635 of the IAC 500 series. *Pesqui. Agropecuária Bras.* 46, 1643–1649.
- 636 Grattapaglia, D., Plomion, C., Kirst, M., and Sederoff, R. R. (2009). Genomics of growth traits in  
637 forest trees. *Curr. Opin. Plant Biol.* 12, 148–156. doi:10.1016/j.pbi.2008.12.008.
- 638 Grattapaglia, D., and Sederoff, R. (1994). Genetic Linkage Maps of *Eucalyptus grandis* and  
639 *Eucalyptus urophylla* using a Pseudo-Testcross: Mapping Strategy and RAPD markers. *Genetics*  
640 137, 1121–1137.
- 641 Guajardo, V., Solís, S., Sagredo, B., Gainza, F., Muñoz, C., Gasic, K., et al. (2015). Construction of  
642 high density sweet cherry (*Prunus avium* L.) linkage maps using microsatellite markers and  
643 SNPs detected by genotyping-by-sequencing (GBS). *PLoS One* 10, 1–17.  
644 doi:10.1371/journal.pone.0127750.
- 645 Hackett, C. a, and Broadfoot, L. B. (2003). Effects of genotyping errors, missing values and  
646 segregation distortion in molecular marker data on the construction of linkage maps. *Heredity*  
647 (*Edinb*). 90, 33–38. doi:10.1038/sj.hdy.6800173.
- 648 Hodel, R. G. J., Segovia-Salcedo, M. C., Landis, J. B., Crawl, A. A., Sun, M., Liu, X., et al. (2016).  
649 The report of my death was an exaggeration: a review for researches using microsatellite in the  
650 21th century. *Appl. Plant Sci.* 4, 1–13. doi:10.3732/apps.1600025.
- 651 Hsiao, T. C., and Xu, L. (2000). Sensitivity of growth of roots versus leaves to water stress:  
652 biophysical analysis and relation to water transport. *J. Exp. Bot.* 51, 1595–1616.  
653 doi:10.1093/jexbot/51.350.1595.
- 654 Jaimes, Y., Rojas, J., Cilas, C., and Furtado, E. L. (2016). Suitable climate for rubber trees affected  
655 by the South American Leaf Blight ( SALB ): Example for identi fi cation of escape zones in the



- 656 Colombian middle Magdalena. *Crop Prot.* 81, 99–114. doi:10.1016/j.cropro.2015.12.016.
- 657 Kosambi, D. D. (1943). The estimation of map distances from recombination values. *Ann. Eugen.* 12,  
658 172–175. doi:10.1111/j.1469-1809.1943.tb02321.x.
- 659 Lander, E. S., and Green, P. (1987). Construction of multilocus genetic linkage maps in humans.  
660 *Proc. Natl. Acad. Sci. USA* 84, 2363–7. doi:10.1073/pnas.84.8.2363.
- 661 Langmead, B., and Salzberg, S. L. (2012). Fast gapped-read alignment with Bowtie 2. *Nat Methods*  
662 9, 357–359. doi:10.1038/nmeth.1923.
- 663 Lau, N., Makita, Y., Kawashima, M., Taylor, T. D., Kondo, S., Othman, A. S., et al. (2016). The  
664 rubber tree genome shows expansion of gene family associated with rubber biosynthesis. *Sci.*  
665 *Rep.* 6, 1–14. doi:10.1038/srep28594.
- 666 Le Guen, V., Gay, C., Xiong, T. C., Souza, L. M., Rodier-Goud, M., and Seguin, M. (2011).  
667 Development and characterization of 296 new polymorphic microsatellite markers for rubber  
668 tree (*Hevea brasiliensis*). *Plant Breed.* 130, 294–296. doi:10.1111/j.1439-0523.2010.01774.x.
- 669 Le Guen, V., Guyot, J., Raimundo, C. R. R., Seguin, M., and Garcia, D. (2008). Long lasting rubber  
670 tree resistance to *Microcyclus ulei* characterized by reduced conidial emission and absence of  
671 teleomorph. *Crop Prot.* 27, 1498–1503. doi:10.1016/j.cropro.2008.07.012.
- 672 Lespinasse, D., Rodier-Goud, M., Grivet, L., Leconte, A., Legnate, H., and Seguin, M. (2000). A  
673 saturated genetic linkage map of rubber tree (*Hevea* spp.) based on RFLP, AFLP, microsatellite,  
674 and isozyme markers. *Theor. Appl. Genet.* 100, 127–138. doi:10.1007/s001220050018.
- 675 Loix, C., Huybrechts, M., Vangronsveld, J., Gielen, M., Keunen, E., and Cuyper, A. (2017).  
676 Reciprocal Interactions between Cadmium-Induced Cell Wall Responses and Oxidative Stress  
677 in Plants. *Front. Plant Sci.* 8, 1–19. doi:10.3389/fpls.2017.01867.
- 678 Luan, S., Albers, M. W., and Schreiber, S. L. (1994). Light-regulated, tissue-specific immunophilins  
679 in a higher plant. *Proc. Natl. Acad. Sci. U. S. A.* 91, 984–8. doi:10.1073/pnas.91.3.984.
- 680 Luo, L. J. (2010). Breeding for water-saving and drought-resistance rice (WDR) in China. *J. Exp.*  
681 *Bot.* 61, 3509–3517. doi:10.1093/jxb/erq185.
- 682 Maliepaard, C., Jansen, J., and Van Ooijen, J. W. (1997). Linkage analysis in a full-sib family of an  
683 outbreeding plant species: overview and consequences for applications. *Genet. Res.* 70, 237–  
684 250. doi:10.1017/S0016672397003005.
- 685 Mantello, C. C., Cardoso-Silva, C. B., Da Silva, C. C., De Souza, L. M., Scaloppi, E. J., de  
686 Gonçalves, P. S., et al. (2014). De Novo assembly and transcriptome analysis of the rubber tree  
687 (*Hevea brasiliensis*) and SNP markers development for rubber biosynthesis pathways. *PLoS One*  
688 9, 1–14. doi:10.1371/journal.pone.0102665.
- 689 Mantello, C. C., Suzuki, F. I., Souza, L. M., Gonçalves, P. S., and Souza, A. P. (2012). Microsatellite  
690 marker development for the rubber tree (*Hevea brasiliensis*): characterization and cross-  
691 amplification in wild *Hevea* species. *BMC Res. Notes* 5, 329. doi:10.1186/1756-0500-5-329.

- 692 Margarido, G. R. A., Souza, A. P., and Garcia, A. A. F. (2007). OneMap: Software for genetic  
693 mapping in outcrossing species. *Hereditas* 144, 78–79. doi:10.1111/j.2007.0018-0661.02000.x.
- 694 Marivet, J., Margis-Pinheiro, M., Frendo, P., and Burkard, G. (1994). Bean cyclophilin gene  
695 expression during plant development and stress conditions. *Plant Mol. Biol.* 26, 1181–1189.
- 696 Marubodee, R., Ogiso-Tanaka, E., Isemura, T., Chankaew, S., Kaga, A., Naito, K., et al. (2015).  
697 Construction of an SSR and RAD-marker based molecular linkage map of *Vigna vexillata* (L.)  
698 A. Rich. *PLoS One* 10, 1–16. doi:10.1371/journal.pone.0138942.
- 699 McCallum, S., Graham, J., Jorgensen, L., Rowland, L. J., Bassil, N. V., Hancock, J. F., et al. (2016).  
700 Construction of a SNP and SSR linkage map in autotetraploid blueberry using genotyping by  
701 sequencing. *Mol. Breed.* 36, 1–24. doi:10.1007/s11032-016-0443-5.
- 702 Mollinari, M., Margarido, G. R. A., Vencovsky, R., and Garcia, A. A. F. (2009). Evaluation of  
703 algorithms used to order markers on genetic maps. *Heredity (Edinb)*. 103, 494–502.  
704 doi:10.1038/hdy.2009.96.
- 705 Moreno, R. M. B., Ferreira, M., Gonçalves, P. S., and Mattoso, L. H. C. (2005). Technological  
706 properties of latex and natural rubber of *Hevea brasiliensis* clones. *Sci. Agric.* 62, 122–126.
- 707 Nielsen, R., Paul, J. S., Albrechtsen, A., and Song, Y. S. (2011). Genotype and SNP calling from  
708 next-generation sequencing data. *Nat. Rev. Genet.* 12, 443–451. doi:10.1038/nrg2986.
- 709 Nirapathongporn, K., Kongsawadworakul, P., Viboonjun, U., Teerawattanasuk, K., Chrestin, H.,  
710 Segiun, M., et al. (2016). Development and mapping of functional expressed sequence tag-  
711 derived simple sequence repeat markers in a rubber tree RRIM600 × PB217 population. *Mol.*  
712 *Breed.* 36, 39. doi:10.1007/s11032-016-0461-3.
- 713 Patel, R. K., and Jain, M. (2012). NGS QC toolkit: A toolkit for quality control of next generation  
714 sequencing data. *PLoS One* 7. doi:10.1371/journal.pone.0030619.
- 715 Peng, Z., Lu, Y., Li, L., Zhao, Q., Feng, Q., Gao, Z., et al. (2013). The draft genome of the fast-  
716 growing non-timber forest species moso bamboo (*Phyllostachys heterocycla*). *Nat. Genet.* 45,  
717 456–61, 461e1–2. doi:10.1038/ng.2569.
- 718 Piepho, H. P., and Möhring, J. (2007). Computing heritability and selection response from  
719 unbalanced plant breeding trials. *Genetics* 177, 1881–1888. doi:10.1534/genetics.107.074229.
- 720 Pootakham, W., Ruang-Areerate, P., Jomchai, N., Sonthirod, C., Sangsrakru, D., Yoocha, T., et al.  
721 (2015). Construction of a high-density integrated genetic linkage map of rubber tree (*Hevea*  
722 *brasiliensis*) using genotyping-by-sequencing (GBS). *Front. Plant Sci.* 6.  
723 doi:10.3389/fpls.2015.00367.
- 724 Pootakham, W., Sonthirod, C., Naktang, C., Ruang-Areerate, P., Yoocha, T., Sangsrakru, D., et al.  
725 (2017). De novo hybrid assembly of the rubber tree genome reveals evidence of paleotetraploidy  
726 in *Hevea* species. *Sci. Rep.* 7, 41457. doi:10.1038/srep41457.
- 727 Priyadarshan, P. M. (2017). Refinements to *Hevea* rubber breeding. *Tree Genet. Genomes* 13, 20.  
728 doi:10.1007/s11295-017-1101-8.

- 729 Priyadarshan, P. M., and Clément-Demange, A. (2004). Breeding Hevea Rubber: Formal and  
730 Molecular Genetics. *Adv. Genet.* 52, 51–115. doi:10.1016/S0065-2660(04)52003-5.
- 731 Priyadarshan, P. M., Gonçalves, P. S., and Omokhafa, K. O. (2009). “Breeding Hevea Rubber,” in  
732 *Breeding Plantation Tree Crops: Tropical Species*, eds. S. M. Jain and P. M. Priyadarshan  
733 (Springer-Verlag New York), 469–522. doi:10.1007/978-0-387-71201-7\_13.
- 734 Rahman, A. Y. A., Usharraj, A. O., Misra, B. B., Thottathil, G. P., Jayasekaran, K., Feng, Y., et al.  
735 (2013). Draft genome sequence of the rubber tree *Hevea brasiliensis*. *BMC Genomics* 14, 75.  
736 doi:10.1186/1471-2164-14-75.
- 737 Rao, G. P., and Kole, P. C. (2016). Evaluation of Brazilian wild *Hevea* germplasm for cold tolerance:  
738 genetic variability in the early mature growth. *J. For. Res.* 27, 755–765. doi:10.1007/s11676-  
739 015-0188-8.
- 740 Romain, B., and Thierry, C. (2011). RUBBERCLONES (Hevea clonal descriptions).  
741 <http://rubberclones.cirad.fr>.
- 742 Saha, T., and Priyadarshan, P. M. (2012). “Genomics of Hevea Rubber,” in *Genomics of Tree Crops*,  
743 eds. R. J. Schnell and P. M. Priyadarshan (New York, NY: Springer New York), 261–298.  
744 doi:10.1007/978-1-4614-0920-5.
- 745 Salgado, L. R., Koop, D. M., Pinheiro, D. G., Rivallan, R., Le Guen, V., Nicolás, M. F., et al. (2014).  
746 De novo transcriptome analysis of *Hevea brasiliensis* tissues by RNA-seq and screening for  
747 molecular markers. *BMC Genomics* 15, 236. doi:10.1186/1471-2164-15-236.
- 748 Schwarz, G. (1978). Estimating the dimension of a model. *Ann. Stat.* 6, 461–464.  
749 doi:10.1214/aos/1176344136.
- 750 Shearman, J. R., Sangsrakru, D., Jomchai, N., Ruangareerate, P., Sonthirod, C., Naktang, C., et al.  
751 (2015). SNP identification from RNA sequencing and linkage map construction of rubber tree  
752 for anchoring the draft genome. *PLoS One* 10, 1–12. doi:10.1371/journal.pone.0121961.
- 753 Shearman, J. R., Sangsrakru, D., Ruang-Areerate, P., Sonthirod, C., Uthapaisanwong, P., Yoocha,  
754 T., et al. (2014). Assembly and analysis of a male sterile rubber tree mitochondrial genome  
755 reveals DNA rearrangement events and a novel transcript. *BMC Plant Biol.* 14, 45.  
756 doi:10.1186/1471-2229-14-45.
- 757 Shields, D. C., Collins, a, Buetow, K. H., and Morton, N. E. (1991). Error filtration, interference,  
758 and the human linkage map. *Proc. Natl. Acad. Sci. U. S. A.* 88, 6501–6505.  
759 doi:10.1073/pnas.88.15.6501.
- 760 Silpi, U., Thaler, P., Kasemsap, P., Lacointe, A., Chantuma, A., Adam, B., et al. (2006). Effect of  
761 tapping activity on the dynamics of radial growth of *Hevea brasiliensis* trees. *Tree Physiol.* 26,  
762 1579–1587.
- 763 Silva, C. C., Mantello, C. C., Campos, T., Souza, L. M., Gonçalves, P. S., and Souza, A. P. (2014).  
764 Leaf-, panel- and latex-expressed sequenced tags from the rubber tree (*Hevea brasiliensis*) under  
765 cold-stressed and suboptimal growing conditions: the development of gene-targeted functional  
766 markers for stress response. *Mol. Breed.* 34, 1035–1053. doi:10.1007/s11032-014-0095-2.

- 767 Souza, L. M., Gazaffi, R., Mantello, C. C., Silva, C. C., Garcia, D., Le Guen, V., et al. (2013). QTL  
768 Mapping of Growth-Related Traits in a Full-Sib Family of Rubber Tree (*Hevea brasiliensis*)  
769 Evaluated in a Sub-Tropical Climate. *PLoS One* 8, e61238. doi:10.1371/journal.pone.0061238.
- 770 Souza, L. M., Mantello, C. C., Santos, M. O., Gonçalves, P. de S., and Souza, A. P. (2009).  
771 Microsatellites from rubber tree (*Hevea brasiliensis*) for genetic diversity analysis and cross-  
772 amplification in six *Hevea* wild species. *Conserv. Genet. Resour.* 1, 75–79. doi:10.1007/s12686-  
773 009-9018-7.
- 774 Souza, L. M., Toledo-Silva, G., Cardoso-Silva, C. B., Silva, C. C., Andreotti, I. A. A., Conson, A. R.  
775 O., et al. (2016). Development of single nucleotide polymorphism markers in the large and  
776 complex rubber tree genome using next-generation sequence data. *Mol. Breed.* 36, 1–10.  
777 doi:10.1007/s11032-016-0534-3.
- 778 Tang, C., Yang, M., Fang, Y., Luo, Y., Gao, S., Xiao, X., et al. (2016). The rubber tree genome  
779 reveals new insights into rubber production and species adaptation. *Nat. Plants* 2, 16073.  
780 doi:10.1038/nplants.2016.73.
- 781 Thornthwaite, C. W., and Mather, J. R. (1955). The water balance. *Publ. Climatol.* 8, 1–104.
- 782 Triwitayakorn, K., Chatkulkawin, P., Kanjanawattana Wong, S., Sraphet, S., Yoocha, T., Sangrakru,  
783 D., et al. (2011). Transcriptome sequencing of *Hevea brasiliensis* for development of  
784 microsatellite markers and construction of a genetic linkage map. *DNA Res.* 18, 471–82.  
785 doi:10.1093/dnares/dsr034.
- 786 Ward, J. a, Bhangoo, J., Fernández-Fernández, F., Moore, P., Swanson, J. D., Viola, R., et al. (2013).  
787 Saturated linkage map construction in *Rubus idaeus* using genotyping by sequencing and  
788 genome-independent imputation. *BMC Genomics* 14, 2. doi:10.1186/1471-2164-14-2.
- 789 Warren-Thomas, E., Dolman, P. M., and Edwards, D. P. (2015). Increasing Demand for Natural  
790 Rubber Necessitates a Robust Sustainability Initiative to Mitigate Impacts on Tropical  
791 Biodiversity. *Conserv. Lett.* 8, 230–241. doi:10.1111/conl.12170.
- 792 Wu, R., Ma, C.-X., Wu, S. S., and Zeng, Z.-B. (2002a). Linkage mapping of sex-specific differences.  
793 *Genet. Res.* 79, 85–96. Available at: <http://www.ncbi.nlm.nih.gov/pubmed/11974606>.
- 794 Wu, R., Ma, C., Painter, I., and Zeng, Z.-B. (2002b). Simultaneous maximum likelihood estimation  
795 of linkage and linkage phases in outcrossing species. *Theor. Popul. Biol.* 61, 349–63.  
796 doi:10.1006/tpbi.2002.1577.
- 797 Wu, Y., Bhat, P. R., Close, T. J., and Lonardi, S. (2008). Efficient and accurate construction of  
798 genetic linkage maps from the minimum spanning tree of a graph. *PLoS Genet* 4, e1000212.  
799 doi:10.1371/journal.pgen.1000212.
- 800 Xu, S. (2008). Quantitative trait locus mapping can benefit from segregation distortion. *Genetics* 180,  
801 2201–2208. doi:10.1534/genetics.108.090688.
- 802 Yang, S., Chen, S., Geng, X. X., Yan, G., Li, Z. Y., Meng, J. L., et al. (2016). The first genetic map  
803 of a synthesized allohexaploid Brassica with A, B and C genomes based on simple sequence  
804 repeat markers. *Theor. Appl. Genet.* 129, 689–701. doi:10.1007/s00122-015-2657-z.

805

806

807

808

809

810

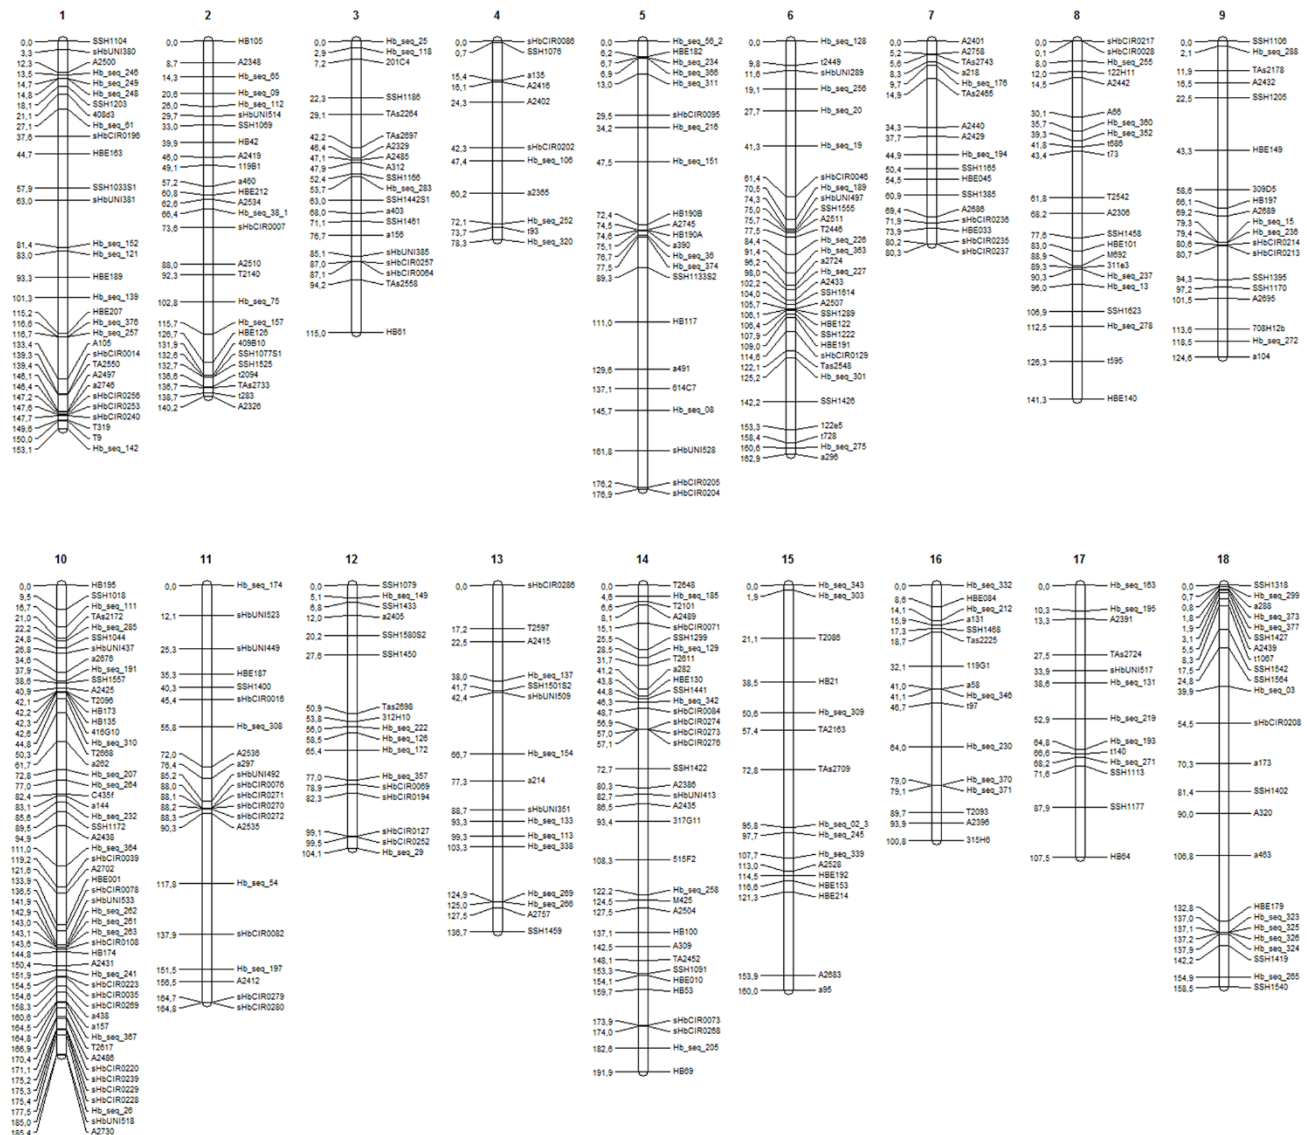

811

812 **Figure 1.** LGs (1 to 18) for the base genetic map, including 411 markers (225 SSRs and 186 SNPs).

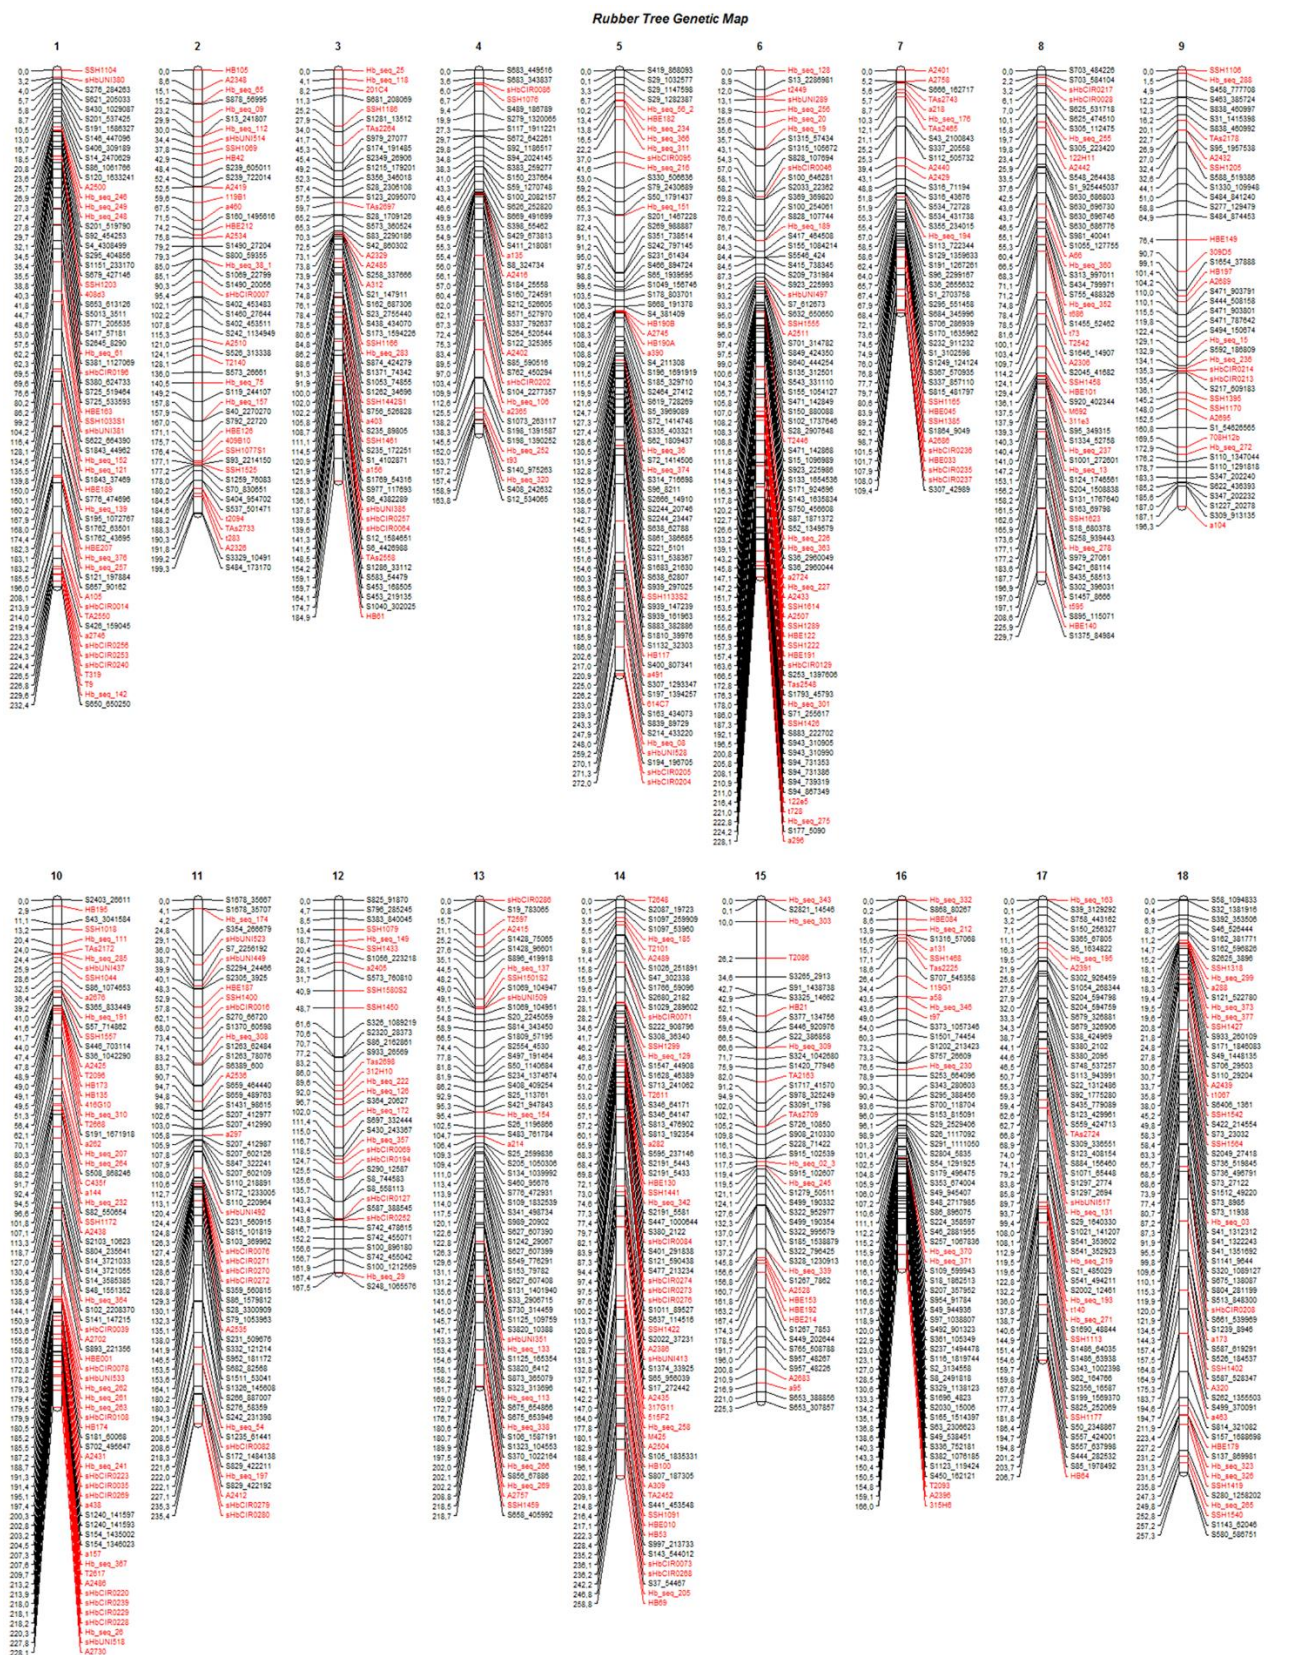

813

814 **Figure 2.** LGs (1 to 18) for the final genetic map, including 1,079 markers for progenies of the cross  
 815 between GT1 and RRM701. Black: GBS-based SNP markers; red: markers from the base map.

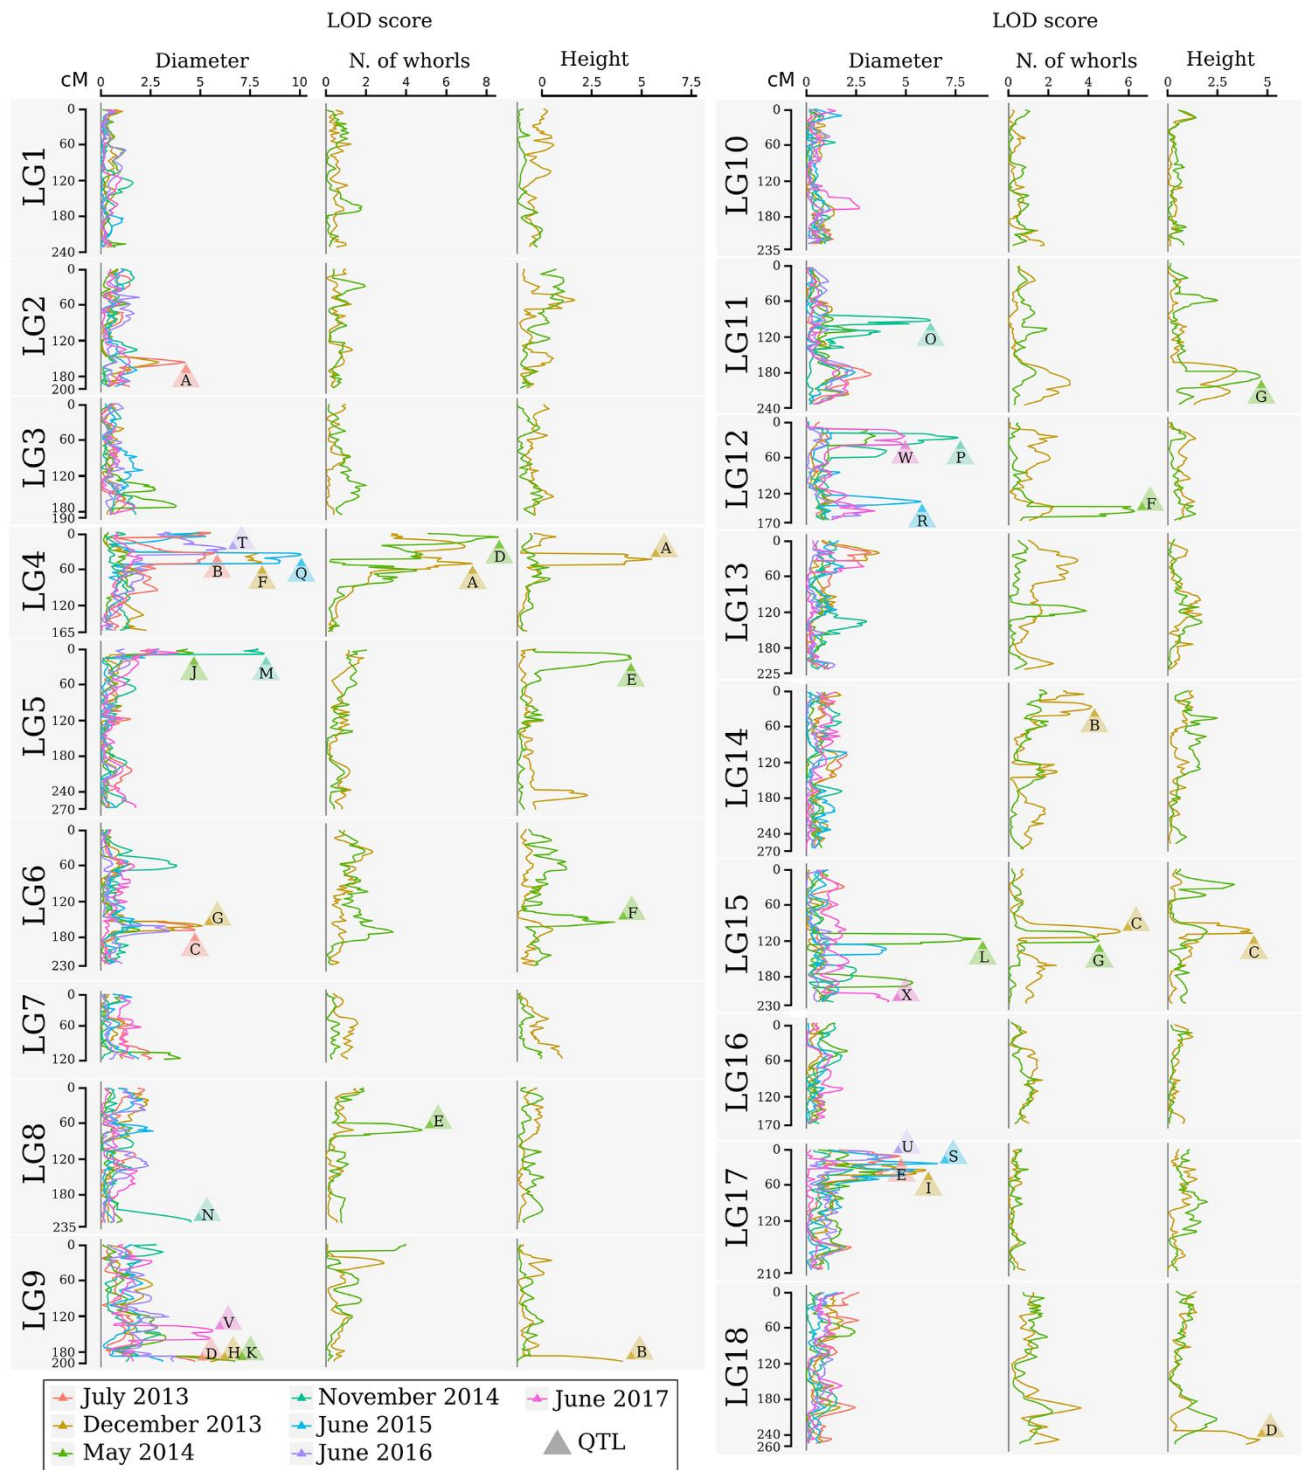

816

817 **Figure 3.** LOD profile of the QTL CIM for stem diameter, number of whorls, and tree height at  
 818 multiple times for the progeny of the cross between GT1 and RRIM701. The LOD score and traits  
 819 are shown on the horizontal axis. The linkage group and map position in cM are shown on the  
 820 vertical axis. The colors indicate different times. Magnification allows one to visualize the genetic  
 821 map and marker IDs. The markers in red also belong to the base map. LOD scores above the  
 822 threshold are indicated by letters, which are described in Table 5.

823 **Supplemental figure legends**

824

825 **Figure S1.** Temperature, precipitation and climatological water balance between July 2012 and  
826 August 2017 in Votuporanga, SP, Brazil. (A) Average maximum temperature, average temperature,  
827 average minimum temperature and monthly precipitation. (B) Evaluation of water excess and deficit  
828 periods. Black arrows indicate phenotypic measurements.

829 **Figure S2.** Boxplot of the genotypic predicted values for diameter (mm), height (m), and the number  
830 of whorls of the F1 population along the months of growth. The genotypic predicted value of the F1  
831 parents RRIM 701 (cross) and GT1 (triangle) are also presented. Growth rates in millimeters per  
832 month (mean and standard deviation) are shown between each boxplot.

833



834 **Table 1.** Overall segregation of SSR and SNP markers mapped in the final map for progenies of the  
 835 GT1 and RRIM701 cross.

| Cross segregation | Genomic SSR | EST-SSR | SNPs     |             |           | Total |
|-------------------|-------------|---------|----------|-------------|-----------|-------|
|                   |             |         | Genomics | Transcripts | GBS-based |       |
| <b>1:1:1:1</b>    | 89          | 39      | -        | -           | -         | 128   |
| <b>1:2:1</b>      | 21          | 22      | 4        | 48          | 72        | 167   |
| <b>1:1</b>        | 23          | 30      | 7        | 125         | 599       | 784   |
| <b>Total</b>      | 133         | 91      | 11       | 173         | 671       | 1079  |

836

837 **Table 2.** Linkage group information regarding the base and final maps from the cross between GT1  
 838 and RRIM701. LG – linkage group; length - mean length in cM; density - mean density in cM; gap -  
 839 length of larger gap in cM.

| LG           | Base Map |      |             |              |          | Final Map |      |             |              |          |
|--------------|----------|------|-------------|--------------|----------|-----------|------|-------------|--------------|----------|
|              | SSRs     | SNPs | Length (cM) | Density (cM) | Gap (cM) | SSRs      | SNPs | Length (cM) | Density (cM) | Gap (cM) |
| <b>1</b>     | 14       | 17   | 153.1       | 4.9          | 18.4     | 13        | 53   | 232.4       | 3.5          | 13.0     |
| <b>2</b>     | 19       | 8    | 140.2       | 5.2          | 14.4     | 19        | 33   | 199.3       | 3.9          | 9.1      |
| <b>3</b>     | 14       | 6    | 115.0       | 5.8          | 20.7     | 14        | 43   | 184.9       | 3.2          | 14.0     |
| <b>4</b>     | 6        | 5    | 78.3        | 7.1          | 17.9     | 6         | 39   | 163.8       | 3.6          | 12.9     |
| <b>5</b>     | 9        | 13   | 176.9       | 8.0          | 24.9     | 9         | 65   | 272.0       | 3.7          | 16.6     |
| <b>6</b>     | 17       | 14   | 162.9       | 5.3          | 20.1     | 17        | 63   | 228.1       | 2.9          | 11.6     |
| <b>7</b>     | 12       | 5    | 80.3        | 4.7          | 19.4     | 12        | 32   | 109.4       | 2.5          | 14.1     |
| <b>8</b>     | 14       | 8    | 141.3       | 6.4          | 18.4     | 14        | 45   | 229.7       | 3.9          | 18.5     |
| <b>9</b>     | 13       | 6    | 124.6       | 6.6          | 20.8     | 13        | 33   | 196.3       | 4.3          | 14.3     |
| <b>10</b>    | 26       | 27   | 185.4       | 3.5          | 16.2     | 26        | 52   | 228.1       | 2.9          | 11.5     |
| <b>11</b>    | 6        | 15   | 164.8       | 7.8          | 27.5     | 6         | 58   | 235.4       | 3.7          | 20.6     |
| <b>12</b>    | 7        | 10   | 104.1       | 6.1          | 23.3     | 7         | 32   | 167.5       | 4.3          | 12.8     |
| <b>13</b>    | 6        | 10   | 136.7       | 8.5          | 24.2     | 6         | 58   | 218.7       | 3.4          | 15.0     |
| <b>14</b>    | 22       | 13   | 191.9       | 5.5          | 15.6     | 22        | 51   | 258.8       | 3.5          | 17.0     |
| <b>15</b>    | 10       | 6    | 160.0       | 10.0         | 32.5     | 10        | 39   | 225.3       | 4.6          | 16.2     |
| <b>16</b>    | 10       | 6    | 100.8       | 6.3          | 17.3     | 10        | 53   | 166.0       | 2.6          | 12.9     |
| <b>17</b>    | 6        | 7    | 107.5       | 8.3          | 19.6     | 6         | 54   | 206.7       | 3.6          | 9.8      |
| <b>18</b>    | 14       | 10   | 158.5       | 6.6          | 26.0     | 14        | 52   | 257.3       | 3.9          | 17.1     |
| <b>Total</b> | 225      | 186  | 2482.3      | 6.0          | 32.5     | 224       | 855  | 3779.7      | 3.5          | 20.6     |

840

841

842

843 **Table 3.** Variance-covariance structures and criteria information for the adjusted models.  $G_{(AB,AG)}$ :  
 844 Variance-covariance matrices for effects of replicates within block within age and genotype within  
 845 age;  $R_{(C,R,A)}$ : variance-covariance matrices for the column, row, and age for residual effects; df:  
 846 degrees of freedom; Corh: matrix of heterogeneous variance with correlation; US: non-structured  
 847 variance-covariance matrix; Ar1h: first-order autoregressive correlation matrix with heterogeneous  
 848 variance; Ar1: first-order autoregressive correlation matrix without variance.

| Trait            | $G_{AB}$ | $G_{AG}$ | $R_C$ | $R_R$ | $R_A$ | df | AIC      | BIC      | logREML   |
|------------------|----------|----------|-------|-------|-------|----|----------|----------|-----------|
| Tree height      | US       | US       | Ar1   | Ar1   | US    | 11 | -767.01  | -707.69  | 394.50    |
| Stem diameter    | Corh     | Corh     | Ar1   | Ar1   | Ar1h  | 26 | 22235.43 | 22407.92 | -11091.72 |
| Number of whorls | US       | US       | Ar1   | Ar1   | US    | 11 | 1772.50  | 1831.81  | -875.25   |

849

850 **Table 4.** Summary of the predicted genotypic values and estimations of additive genetic ( $\sigma_{AG}^2$ ) and  
 851 phenotypic ( $\sigma_{RA}^2$ ) variances and heritability ( $\hat{H}^2$ ) components for tree height (TH), stem diameter  
 852 (SD), and number of whorls (NW) of rubber trees.

| Trait/Age    | Predicted Genotypic Values |                 |              |       |         | $\sigma_{AG}^2$ | $\sigma_{RA}^2$ | $\hat{H}^2$ |
|--------------|----------------------------|-----------------|--------------|-------|---------|-----------------|-----------------|-------------|
|              | F1<br>(Minimum)            | F1<br>(Maximum) | F1<br>(Mean) | GT1   | RRIM701 |                 |                 |             |
| TH/17 months | 1.52                       | 2.63            | 2.19         | 2.28  | 3.33    | 0.07            | 0.23            | 0.54        |
| TH/22 months | 2.72                       | 3.85            | 3.33         | 2.06  | 2.98    | 0.11            | 0.41            | 0.51        |
| SD/12 months | 14.91                      | 18.17           | 16.87        | 16.05 | 15.64   | 0.64            | 11.35           | 0.55        |
| SD/17 months | 18.72                      | 23.71           | 21.76        | 20.41 | 19.84   | 1.51            | 18.14           | 0.55        |
| SD/22 months | 24.95                      | 32.81           | 29.64        | 27.74 | 26.69   | 3.63            | 25.23           | 0.57        |
| SD/28 months | 31.31                      | 38.66           | 36.02        | 33.96 | 32.85   | 3.27            | 39.00           | 0.54        |
| SD/35 months | 42.41                      | 57.90           | 51.68        | 47.81 | 46.00   | 13.78           | 64.71           | 0.57        |
| SD/47 months | 60.15                      | 82.03           | 73.69        | 68.42 | 64.62   | 29.62           | 123.66          | 0.56        |
| SD/59 months | 66.21                      | 95.10           | 83.58        | 75.48 | 71.93   | 47.02           | 204.38          | 0.56        |
| NW/17 months | 5.53                       | 7.69            | 6.80         | 7.00  | 6.59    | 0.22            | 1.23            | 0.45        |
| NW/22 months | 7.52                       | 10.08           | 9.03         | 9.27  | 8.75    | 0.32            | 1.75            | 0.45        |

853

854 **Table 5.** QTL mapping for tree height, number of whorls, and stem diameter for progenies of the cross GT1 x RRIM701. The phenotypes  
855 were evaluated at 12, 17, 22, 28, 35, 47, and 59 months. LG - linkage group; LOD - global LOD score; R<sup>2</sup> - explained phenotypic variation;  
856 LOD<sup>(2),(3),(4)</sup> - LOD values for additive and dominance effects.

| QTL             | ID in Fig. 3 | LG | Position (cM) | LOD  | R <sup>2</sup> | Additive effect for GT1 | LOD <sup>(2)</sup> | Additive effect for RRIM701 | LOD <sup>(3)</sup> | Dominance effect | LOD <sup>(4)</sup> | Segregation pattern |
|-----------------|--------------|----|---------------|------|----------------|-------------------------|--------------------|-----------------------------|--------------------|------------------|--------------------|---------------------|
| Height17-LG4    | A            | 4  | 43.41         | 6.72 | 14.07          | -0.049                  | 3.256              | 0.054                       | 3.965              | -0.018           | 0.496              | 1:2:1               |
| Height17-LG9    | B            | 9  | 196.26        | 5.28 | 6.24           | -0.002                  | 0.006              | 0.038                       | 1.881              | -0.050           | 3.106              | 1:2:1               |
| Height17-LG15   | C            | 15 | 108.00        | 4.23 | 7.44           | -0.004                  | 0.020              | -0.039                      | 2.067              | -0.049           | 2.789              | 1:2:1               |
| Height17-LG18   | D            | 18 | 251.44        | 4.60 | 7.38           | -0.029                  | 1.193              | -0.055                      | 3.606              | -0.007           | 0.054              | 1:2:1               |
| Height22-LG5    | E            | 5  | 15.00         | 5.70 | 7.18           | -0.027                  | 3.782              | -0.019                      | 1.734              | 0.013            | 0.828              | 1:2:1               |
| Height22-LG6    | F            | 6  | 155.55        | 4.89 | 8.14           | -0.033                  | 1.177              | -0.003                      | 0.034              | 0.031            | 4.362              | 1:2:1               |
| Height22-LG11   | G            | 11 | 189.00        | 4.37 | 8.40           | -0.003                  | 0.053              | 0.026                       | 3.215              | 0.017            | 1.245              | 1:2:1               |
| Whorls17-LG4    | A            | 4  | 49.91         | 7.27 | 8.25           | -0.089                  | 3.419              | 0.093                       | 3.810              | 0.058            | 1.075              | 3:1                 |
| Whorls17-LG14   | B            | 14 | 26.00         | 4.13 | 1.08           | -0.067                  | 1.755              | -0.134                      | 2.805              | 0.012            | 0.065              | 1:2:1               |
| Whorls17-LG15   | C            | 15 | 105.19        | 5.56 | 10.22          | -0.032                  | 0.366              | -0.088                      | 2.827              | -0.099           | 3.310              | 1:2:1               |
| Whorls22-LG4    | D            | 4  | 6.04          | 8.59 | 7.67           | 0.011                   | 0.853              | -0.009                      | 0.531              | -0.029           | 7.036              | 1:1:1:1             |
| Whorls22-LG8    | E            | 8  | 71.10         | 4.78 | 3.78           | 0.012                   | 1.750              | -0.014                      | 2.120              | 0.012            | 1.822              | 3:1                 |
| Whorls22-LG12   | F            | 12 | 152.15        | 6.26 | 5.31           | 0.009                   | 1.078              | 0.017                       | 3.470              | 0.011            | 1.518              | 3:1                 |
| Whorls22-LG15   | G            | 15 | 121.11        | 4.49 | 6.01           | -0.006                  | 0.406              | -0.003                      | 0.086              | -0.020           | 4.059              | 1:1                 |
| Diameter12-LG2  | A            | 2  | 157.93        | 4.22 | 3.80           | -0.077                  | 0.619              | -0.044                      | 0.224              | 0.195            | 4.017              | 1:1                 |
| Diameter12-LG4  | B            | 4  | 34.77         | 5.69 | 9.73           | -0.106                  | 1.443              | 0.143                       | 2.087              | 0.118            | 1.295              | 3:1                 |
| Diameter12-LG6  | C            | 6  | 170.00        | 4.72 | 8.75           | -0.140                  | 2.258              | -0.057                      | 0.376              | 0.164            | 2.802              | 1:2:1               |
| Diameter12-LG9  | D            | 9  | 196.26        | 4.73 | 6.43           | -0.129                  | 1.834              | -0.025                      | 0.071              | -0.189           | 3.800              | 1:2:1               |
| Diameter12-LG17 | E            | 17 | 11.05         | 4.71 | 5.13           | 0.274                   | 2.179              | -0.056                      | 0.442              | 0.140            | 2.471              | 1:2:1               |
| Diameter17-LG4  | F            | 4  | 49.91         | 8.08 | 13.04          | -0.081                  | 3.381              | 0.093                       | 4.152              | 0.042            | 0.823              | 1:2:1               |
| Diameter17-LG6  | G            | 6  | 163.63        | 5.09 | 6.87           | -0.042                  | 0.899              | -0.040                      | 0.867              | 0.087            | 4.057              | 3:1                 |
| Diameter17-LG9  | H            | 9  | 193.00        | 5.85 | 4.74           | -0.049                  | 1.134              | -0.012                      | 0.062              | -0.119           | 5.344              | 1:1:1:1             |
| Diameter17-LG17 | I            | 17 | 35.00         | 5.99 | 6.58           | 0.028                   | 0.406              | -0.019                      | 0.205              | 0.110            | 5.068              | 1:1                 |
| Diameter22-LG5  | J            | 5  | 6.74          | 4.66 | 8.09           | -0.129                  | 2.771              | -0.027                      | 0.123              | 0.116            | 2.000              | 1:2:1               |

|                 |   |    |        |       |       |        |       |        |       |        |       |         |
|-----------------|---|----|--------|-------|-------|--------|-------|--------|-------|--------|-------|---------|
| Diameter22-LG9  | K | 9  | 196.26 | 6.75  | 6.61  | -0.121 | 2.593 | -0.040 | 0.274 | -0.189 | 5.480 | 1:2:1   |
| Diameter22-LG15 | L | 15 | 118.00 | 8.76  | 7.79  | -0.107 | 1.395 | -0.114 | 2.061 | -0.204 | 6.648 | 3:1     |
| Diameter28-LG5  | M | 5  | 8.00   | 8.21  | 11.40 | 0.072  | 7.216 | 0.030  | 1.224 | -0.016 | 0.342 | 1:1:1:1 |
| Diameter28-LG8  | N | 8  | 229.67 | 4.52  | 4.89  | -0.035 | 1.480 | 0.036  | 1.926 | -0.017 | 0.381 | 1:2:1   |
| Diameter28-LG11 | O | 11 | 91.00  | 6.24  | 8.08  | -0.087 | 3.214 | -0.005 | 0.041 | 0.051  | 3.438 | 1:2:1   |
| Diameter28-LG12 | P | 12 | 27.00  | 7.63  | 8.37  | -0.086 | 5.561 | 0.027  | 0.749 | 0.074  | 1.800 | 1:2:1   |
| Diameter35-LG4  | Q | 4  | 37.00  | 10.06 | 12.28 | -0.217 | 1.137 | 0.479  | 4.688 | 0.514  | 4.125 | 3:1     |
| Diameter35-LG12 | R | 12 | 136.00 | 5.74  | 3.99  | 0.190  | 0.826 | 0.013  | 0.004 | 0.490  | 4.580 | 1:1     |
| Diameter35-LG17 | S | 17 | 24.00  | 6.68  | 3.01  | 1.437  | 3.179 | 0.530  | 2.050 | 0.328  | 2.380 | 1:2:1   |
| Diameter47-LG4  | T | 4  | 28.00  | 6.29  | 10.10 | -0.261 | 1.584 | 0.510  | 3.062 | 0.222  | 0.673 | 1:2:1   |
| Diameter47-LG17 | U | 17 | 11.05  | 4.37  | 5.08  | 0.262  | 1.533 | -0.196 | 0.913 | 0.301  | 1.723 | 3:1     |
| Diameter59-LG9  | V | 9  | 144.00 | 5.61  | 9.59  | -0.316 | 3.071 | -0.173 | 0.921 | -0.337 | 2.978 | 3:1     |
| Diameter59-LG12 | W | 12 | 24.24  | 4.97  | 13.03 | 0.258  | 2.047 | 0.202  | 0.949 | -0.538 | 2.712 | 3:1     |
| Diameter59-LG15 | X | 15 | 224.00 | 4.15  | 4.65  | 0.262  | 2.058 | 0.284  | 1.915 | -0.134 | 0.438 | 1:2:1   |

858 **Table S1.** SNPs developed from full-length expressed sequence tag (EST) libraries and bark  
859 transcriptome assembled de novo.

860 **Table S2.** Variance-covariance structures adjusted and compared based on the Akaike information  
861 criterion (AIC) (Akaike, 1974) and the Bayesian information criterion (BIC) (Schwarz, 1978).  
862  $G_{(AB,AG)}$ : variance-covariance matrices for effects of replicates within block within age and genotype  
863 within age;  $R_{(C,R,A)}$ : variance-covariance matrices for column, row, and age for the residual effects;  
864 df: degrees of freedom; ID: identity matrix (homogeneous genetic variance without correlation);  
865 Diag: diagonal matrix (heterogeneous genetic variance without correlation); FA: factor analytic;  
866 Corh: matrix of heterogeneous variance with correlation; US: non-structured variance-covariance  
867 matrix; Ar1h: first-order autoregressive correlation matrix with heterogeneous variance; Ar1: first-  
868 order autoregressive correlation matrix without variance.

869 **Table S3.** Consensus map anchoring the final rubber tree map with 1,079 markers for the cross GT1  
870 x RRIM701 into the scaffolds assembled by Tang *et al.* (2016).

871 **Table S4.** Functional annotation for genes contained within the marker interval of each identified  
872 QTL.

873
